1  
2  
3  
4  
5  
6  
7  
8  
9  
10  
11  
12  
13  
14  
15  
16  
17  
18  
19  
20  
21  
22

**Full title: H<sub>2</sub>S mediates interbacterial communication through the air reverting  
intrinsic antibiotic resistance**

**Short title: H<sub>2</sub>S producing bacteria can interfere with other species resistance to antibiotics**

Thomas-Lopez, Daniel <sup>1</sup>; Carrilero, Laura <sup>1</sup>; Matrat, Stephanie <sup>1</sup>; Montero, Natalia <sup>1</sup>;  
Claverol, Stéphane <sup>2</sup>; Filipovic, Milos R <sup>3</sup>; Gonzalez-Zorn, Bruno <sup>1\*</sup>

<sup>1</sup> *Departamento de Sanidad Animal (Facultad de Veterinaria) and Centro de Vigilancia  
Sanitaria Veterinaria (VISAVET), Universidad Complutense de Madrid, Spain*

<sup>2</sup> *Plateforme Protéome, Centre Génomique Fonctionnelle de Bordeaux, Université de  
Bordeaux, Bordeaux, France*

<sup>3</sup> *University of Bordeaux and CNRS; IBGC, UMR 5095, Bordeaux, France*

\*Corresponding author: *Universidad Complutense de Madrid, Tel: +34 913943707,  
Fax: +34 913943908. Email: bgzorn@ucm.es*

## 23     **Abstract**

24     Hydrogen sulfide, a gas classically considered as a by-product of cellular metabolism, is  
 25     today recognized as a crucial gasotransmitter in Eukaryotes. Moreover, most bacteria  
 26     harbor the eukaryotic orthologous genes for H<sub>2</sub>S synthesis, and these genes have been  
 27     linked to different metabolic pathways.

28     Some bacteria, however, produce high amounts of H<sub>2</sub>S in their extracellular space, a  
 29     characteristic classically used for identification purposes. This is the case of *Salmonella*  
 30     Typhimurium, which produces H<sub>2</sub>S by its *phsABC* operon. Here we show that  
 31     extracellular release of H<sub>2</sub>S by *S. Typhimurium* is solely dependent on its *phsABC*  
 32     operon. Furthermore, we show that *S. Typhimurium* and other H<sub>2</sub>S-producing bacteria  
 33     can interact with physically distant bacteria through H<sub>2</sub>S production. We demonstrate  
 34     how H<sub>2</sub>S can revert intrinsic cephalosporin resistance of *Enterococcus faecalis* and  
 35     *Enterococcus faecium* to complete susceptibility. This study constitutes a significant  
 36     step in the study of bacterial interplay and niche competition. Furthermore, as H<sub>2</sub>S  
 37     releasing drugs have already been designed, our results open the way to future  
 38     therapeutic alternatives for the treatment of infections caused by enterococci,  
 39     multiresistant pathogens for which no treatments are clinically available.

40

41

## 42 **Author Summary**

43

44 It has been known for decades that bacteria can communicate with each other through  
45 the diffusion of metabolites in the media. However, the capacity of a bacterium to  
46 interact with other physically distant cell is a recent discovery of the 21<sup>st</sup> century. In this  
47 work we show how some well-studied bacteria, as it is *Salmonella* spp., interacts with  
48 other bacteria thanks to the compound hydrogen sulfide (H<sub>2</sub>S) that they produce and  
49 release to the environment.

50 In our study we have designed novel techniques that allow us to study the interaction  
51 between two bacteria, and we have seen that *Salmonella* is able to affect other species  
52 that is even 1 cm away, *i.e.*, a distance corresponding to 10.0000 times its own size.

53 What is more astonishing is that *Enterococcus*, when exposed to the H<sub>2</sub>S, is  
54 dramatically becomes susceptible to many antibiotics, to which it is supposed to be  
55 naturally resistant. *Enterococcus* spp. are responsible for life-threatening infections in  
56 hospitals worldwide. Thus, our observations reveal that bacteria can communicate  
57 through the air with H<sub>2</sub>S, and that this molecule can make bacteria that are highly  
58 resistant to antibiotics susceptible to antibiotics, making untreatable infections treatable  
59 with current antibiotics.

60

61

62

63

## 64    **Introduction**

65    It is well established that bacteria can communicate with each other through the  
66    diffusion of molecules in the media, what we know as quorum sensing [1]. On the other  
67    hand, in the 21<sup>st</sup> century it has been discovered that physically distant bacteria can also  
68    interact with each other or with distant organisms by releasing gaseous molecules [2],  
69    many of which were previously considered mere byproducts of bacterial metabolism.  
70    Ammonia [3], indole [4], trimethylamine [4] or acetic acid [5] are some these volatile  
71    compounds responsible for changes in motility, biofilm formation or antibiotic  
72    resistance. In addition, there are a few gases, called gasotransmitters, that are  
73    particularly interesting as they also play important roles in eukaryotic cells [6].  
74    Gasotransmitters include mainly nitric oxide (NO), hydrogen sulfide (H<sub>2</sub>S) and carbon  
75    monoxide (CO), and they have been connected to physiological and pathological  
76    conditions in cancer [7], the cardiovascular system [8,9], potassium channels [10],  
77    cellular ageing [11], animal hibernation [12] and grapes' senescence [13], among others.

78    In microbiology, NO and H<sub>2</sub>S have received special attention as they enhance global  
79    antimicrobial resistance [14,15]. Bacteria have been shown to possess the orthologous  
80    genes to those found in eukaryotic cells for the production of these gases.

81    In the case of hydrogen sulfide, Shatalin *et al.* revealed that this gas confers  
82    intracellularly general protection against the bactericidal action of antibiotics through  
83    the eukaryotic orthologous pathways cystathionine-β-synthase (CBS), cystathionine-γ-  
84    lyase (CSE) or 3-mercaptopyruvate sulfurtransferase (3MST), present in many bacterial  
85    families of clinical interest [15].

86    However, H<sub>2</sub>S production in large amounts by specific pathways found in certain  
87    bacteria, *e. g.* from the *Salmonella*, *Citrobacter*, *Edwardsiella* and *Proteus* genera, has

88 been well known for more than 50 years [16]. Of the different H<sub>2</sub>S synthesis  
 89 mechanisms in bacteria, the most accurately characterized is the *phsABC* operon of  
 90 *Salmonella* Typhimurium, which generates H<sub>2</sub>S and sulfite through thiosulfate  
 91 reduction. The purpose of this H<sub>2</sub>S synthesis by *S. Typhimurium* is not well understood.  
 92 It is well established that in the host's gut, thiosulfate can be oxidized to tetrathionate,  
 93 which can be used by *S. Typhimurium* for respiratory purposes (reducing it again to  
 94 thiosulfate) thanks to the *ttr* genes located in the pathogenicity island 2 (SPI-2) [17].  
 95 However, the benefits of a further reduction of thiosulfate to H<sub>2</sub>S (instead of using it for  
 96 further tetrathionate production) are very scarce [18].

97 Besides, if the function of this gas in bacteria is to enhance antibiotic resistance  
 98 [15,19,20], it is intriguing that some species, like the gram positive *Enterococcus*,  
 99 inhibit H<sub>2</sub>S production by others [21]. However, this suggests that H<sub>2</sub>S might be  
 100 interacting with neighboring microorganisms, as it is the case with other molecules  
 101 already mentioned.

102 Here we characterize the implication of the *phsABC* operon in H<sub>2</sub>S synthesis by *S.*  
 103 *Typhimurium*. As H<sub>2</sub>S produced by the PHS pathway is released extracellularly, we  
 104 studied if *S. Typhimurium* could communicate with other bacteria thanks to its H<sub>2</sub>S  
 105 production. We observed that it is not only the interaction that takes place but that *S.*  
 106 *Typhimurium* can also revert other bacteria intrinsic antibiotic resistance, suggesting  
 107 niche competition situations can be more complex than expected. Finally, we also  
 108 demonstrate that H<sub>2</sub>S abolishes antibiotic resistance. As H<sub>2</sub>S releasing donors have  
 109 already been developed, the combined application of antibiotics with H<sub>2</sub>S requires  
 110 future in depth studying.

111

# 112     **Results**

## 113     **H<sub>2</sub>S excretion relies entirely on *phsABC* action**

114     Most bacteria possess H<sub>2</sub>S producing genes, namely CBS/CSE and 3MST [15], together  
 115     with cysteine desulfhydrases [22]. Nevertheless, a few bacterial species carry, in  
 116     addition to the previously mentioned genes, an accessory and specific H<sub>2</sub>S producing  
 117     pathway. For example, *Salmonella* Typhimurium harbors the *phsABC* operon. To  
 118     understand the role of this pathway, we deleted this operon (Fig 1A) and we measured  
 119     the H<sub>2</sub>S production of the deletion mutant  $\Delta phs$ , both in aerobic and anaerobic  
 120     conditions.

121     Kligler media, which in the presence of H<sub>2</sub>S forms a dark precipitate, turned completely  
 122     black when *S. Typhimurium* wild-type strain was inoculated, whereas  $\Delta phs$  did not  
 123     produce any black pigmentation of the media at all (Fig 1B).

124     Lead (II) acetate paper strips, which detect H<sub>2</sub>S through the formation of black lead  
 125     sulfide, allowed us to detect H<sub>2</sub>S released not only to the media, but also outside of the  
 126     media, as the strips were located above the culture medium. Again, we observed that the  
 127     strips turned completely black with the WT culture, while incubation of  $\Delta phs$  strain  
 128     barely caused any staining (Fig 1C).

129     In both cases, complementation of the strain with the pSB74 plasmid, which will be  
 130     called pH<sub>2</sub>S as it bears the entire *phsABC* operon [23], restored H<sub>2</sub>S production at WT  
 131     levels in the new strain *S. Typhimurium*  $\Delta phs^c$  (Fig 1).

132

133

134

135

136

137 **The PHS pathway is neither involved in growth nor antibiotic resistance in *S.***

138 ***Typhimurium***

139 H<sub>2</sub>S has been linked to antibiotic resistance, via the H<sub>2</sub>S synthesis pathways found in

140 most bacteria [15,20]. However, this has not been demonstrated for the *S. Typhimurium*

141 specific PHS pathway, even though this is considered the main source of H<sub>2</sub>S in this

142 species [23,24]. Therefore, we carried out various antimicrobial susceptibility tests (S1

143 Fig, **Error! Reference source not found.**S1 and S2 Tables), but no differences were

144 observed in any case. Growth curves showed no difference either in growth rate

145 between WT and  $\Delta phs$  strain (S1 Fig).

146

147

148 **Remote action of *S. Typhimurium* on the intrinsic antibiotic resistance of**

149 ***Enterococcus***

150 H<sub>2</sub>S produced by means of the PHS pathway by *S. Typhimurium* is largely released

151 from the cell and does not appear to be implicated its own growth or antibiotic

152 resistance. Thus, we hypothesized that H<sub>2</sub>S may have an external role on the antibiotic

153 resistance pattern of neighboring bacteria when *S. Typhimurium* interacted with them.

154 We designed a model to effectively assess signaling between physically distant bacteria

155 (Fig 2). This method consists in preparing antibiograms of the species to be tested and

156 confronting them against another Petri dish in which the H<sub>2</sub>S producing strain has been

157 plated with a cotton swab. Subsequently, plates were incubated for a maximum of 24

158 hours.

159

160 *S. Typhimurium* did not significantly alter bacterial growth, hemolysis capacity,  
161 colonies' size and morphology or the antibiotic sensitivity profile of the species  
162 analyzed, which includes methicillin-resistant *Staphylococcus aureus*, *Bacillus cereus*,  
163 *Escherichia coli*, *Proteus vulgaris* and the *S. Typhimurium*  $\Delta phs$  mutant itself (data not  
164 shown).

165 However, when faced with *S. Typhimurium*, *E. faecalis*, a major nosocomial pathogen  
166 worldwide, became completely susceptible against cephalosporins, drugs to which  
167 *Enterococcus* is intrinsically resistant (Fig 3).

168

169 **The *phsABC* operon of *Salmonella* is responsible for the reversion of *Enterococcus***  
170 **intrinsic antibiotic resistance**

171 To distinguish if enterococci lose their cephalosporin resistance due to H<sub>2</sub>S released by  
172 *S. Typhimurium* or by an unrelated mechanism, we confronted *E. faecalis* with the  
173 deletion mutant  $\Delta phs$ , which we have shown not to release any H<sub>2</sub>S.

174 By performing E-test, we observed that *E. faecalis* Minimal Inhibitory Concentration  
175 (MIC) for cefotaxime was dramatically decreased, from higher than 256 mg/L to 3  
176 mg/L, when faced specifically with *S. Typhimurium* WT, *i. e.*, the H<sub>2</sub>S producing strain.  
177 On the other hand, the MIC was not affected when faced with *S. Typhimurium*  $\Delta phs$   
178 strain (Fig 4).

179  $\Delta phs$  mutant recovered its lethal action against *E. faecalis* when was complemented *in*  
180 *trans* (Table 1), which means that it is specifically via the H<sub>2</sub>S produced by the *phsABC*  
181 operon that *S. Typhimurium* induces *Enterococcus* killing. *S. Typhimurium* (pTrc99a),



182 *i.e.*, the strain carrying the empty vector pTrc99a, was used as a negative control to  
183 ensure that this plasmid had no influence on the effect. As we established that *phsABC*  
184 is a predominant mechanism for extracellular H<sub>2</sub>S release from this species, we  
185 conclude that this operon is crucial for the remote induced killing of neighbor bacteria  
186 by *S. Typhimurium*.

187

188 **Table 1. Confronting experiments of *E. faecalis* with *S. Typhimurium* WT and its**  
189 **respective mutants.**

190

| Strains                                              | + T-S 2 mM |           |     | + T-S 20 mM |           |    | + Cys 2 mM |           |    | + T-S 20 mM Anaerobiosis |           |    |
|------------------------------------------------------|------------|-----------|-----|-------------|-----------|----|------------|-----------|----|--------------------------|-----------|----|
|                                                      | ZOX        | CTX       | CEC |             |           |    |            |           |    |                          |           |    |
| <i>E. faecalis</i>                                   | 6          | 6         | 16  |             |           | -  |            |           | -  |                          |           | -  |
| <i>vs. S. Typhimurium</i> WT                         | <u>28</u>  | <u>30</u> | 19  | <u>25</u>   | <u>33</u> | 16 | <u>27</u>  | <u>30</u> | 17 | <u>22</u>                | <u>26</u> | 19 |
| <i>vs. S. Typhimurium</i> $\Delta phs$               | 6          | 6         | 14  | 6           | 6         | 12 | <u>27</u>  | <u>30</u> | 17 | 6                        | 6         | 14 |
| <i>vs. <math>\Delta phs</math> (pTrc99a)</i>         | 6          | 6         | 14  | 6           | 6         | 13 | <u>23</u>  | <u>23</u> | 16 |                          |           | ND |
| <i>vs. <math>\Delta phs</math> (pH<sub>2</sub>S)</i> | <u>25</u>  | <u>28</u> | 16  | <u>32</u>   | <u>34</u> | 16 | <u>25</u>  | <u>27</u> | 17 |                          |           | ND |

191 ND: not determined

192 *E. faecalis* JH2-2 is plated on Tryptone-Soya Agar (TSA). *S. Typhimurium* strains are plated on  
193 TSA supplemented with thiosulfate 2 or 20 mM. Halos are expressed in mm. Inhibition zones  
194 displayed only in the presence of H<sub>2</sub>S are underlined. Ceftizoxime (ZOX), Cefotaxime (CTX),  
195 Cefaclor (CEC).

196

197

198

199   **The *phsABC* operon is sufficient to induce cephalosporin susceptibility in *E.***  
 200   ***faecalis***

201   To identify if the product of the *phsABC* operon was having an effect in adjuvancy with  
 202   other factors from *S. Typhimurium*, we transformed *E. coli* MG1655 strain with the  
 203   pH<sub>2</sub>S plasmid. We show that the *phsABC* operon is sufficient for the increased  
 204   production of H<sub>2</sub>S by *E. coli* MG1655 (Fig 5), implying that no further networks or  
 205   genes present in *Salmonella* are necessary. Lead (II) acetate paper strips were stained in  
 206   a similar way in *E. coli* (pH<sub>2</sub>S) and *S. Typhimurium*. When *E. coli* (pH<sub>2</sub>S) was  
 207   incubated in Kligler media, we observed a lesser amount of staining than in *S.*  
 208   Typhimurium. This can be explained by the fact that *S. Typhimurium* also harbors the  
 209   anaerobic sulfite reductase (*asr*) that generates further H<sub>2</sub>S from the reduction of the  
 210   sulfite previously generated by PHS.

211   Furthermore, when we confronted different *E. coli* strains with *E. faecalis*, we observed  
 212   that only *E. coli* (pH<sub>2</sub>S) could induce the susceptibility of *E. faecalis* to cephalosporins  
 213   (Fig 3), showing that the *phsABC* function is sufficient for the resistance reversion  
 214   phenomenon carried out by H<sub>2</sub>S and that no secondary metabolites produced by *S.*  
 215   Typhimurium are necessary.

216   We also tested if our observations could be dependent on the presence of oxygen.  
 217   However, the confrontations experiments performed in aerobiosis and anaerobiosis  
 218   showed similar results (Table 1), discarding therefore that our results are connected to  
 219   an augmentation of the reactive oxidative species.

220

221

## 222 **H<sub>2</sub>S is responsible for the reversion of the intrinsic resistance to cephalosporins in** 223 ***E. faecalis***

224 The deletion of the *phsABC* operon of *S. Typhimurium* could have further consequences  
225 on the bacteria (*e. g.*, affecting other metabolic pathways) that could ultimately be  
226 responsible for the distant effect observed on *Enterococcus* rather than the H<sub>2</sub>S itself.  
227 To rule out this hypothesis, we tested other sources of H<sub>2</sub>S. First, we carried out  
228 confrontation experiments in the presence of cysteine, the substrate of the 3MST  
229 pathway [15], present in many bacteria including *S. Typhimurium*. Even if we have  
230 proved that under basal conditions PHS is the predominant mechanism for extracellular  
231 production of H<sub>2</sub>S, we hypothesized that addition of external cysteine should increase  
232 the production of H<sub>2</sub>S by this pathway, as high levels of cysteine are toxic for the cell  
233 [22]. Upon adding cysteine, we observed that H<sub>2</sub>S is again detected extracellularly in  
234 the  $\Delta phs$  mutant (Fig 1) and that this mutant is able to revert *Enterococcus*  
235 cephalosporin resistance in a similar extent as the wild-type *S. Typhimurium* (Table 1).  
236 We confronted *E. faecalis* with *Proteus vulgaris*, another species commonly known for  
237 its extracellular production of H<sub>2</sub>S [22] and *P. vulgaris* proved to be equally efficient in  
238 inducing cephalosporin susceptibility in *E. faecalis* (Fig 3).

239 Finally, we checked if pure H<sub>2</sub>S from a chemical origin also acts synergistically with  
240 cephalosporins. NaHS is a widely used H<sub>2</sub>S source [15,25]. We designed a technique in  
241 which we placed NaHS physically separated from the enterococci. We put our  
242 antibiograms in a glass chamber, next to an empty Petri dish in which we placed 0.1  
243 grams of NaHS and 2 mL of ultrapure water. Once we sealed the chamber, we gently  
244 shook it to put the crystal into contact with the water so that the gaseous H<sub>2</sub>S could be  
245 released into the chamber (Fig 6).

246 With this experiment, we proved that the resistance of *E. faecalis* to cephalosporins  
247 could be reversed by pure H<sub>2</sub>S. In addition, we also showed that other *E. faecalis* strains  
248 are affected in the same way. Most notably, V583, the first vancomycin resistant clinical  
249 isolate, displayed the same phenotype (Fig 7).

250

## 251 ***E. faecium* cephalosporin resistance is also reverted in the presence of H<sub>2</sub>S**

252 Next, we were interested in testing the effects of H<sub>2</sub>S on the other pathogenic  
253 enterococcus, *E. faecium*, as in the last decade this species has acquired even higher  
254 clinical relevance than *E. faecalis*, partially because most of the enterococcal  
255 vancomycin resistant clones currently detected are *E. faecium* [26]. We have verified  
256 that this species is also susceptible to the synergic effect of H<sub>2</sub>S with cephalosporins  
257 (Fig 8), further suggesting the potential application of this combination in clinical  
258 settings.

259

## 260 **Reversion of the intrinsic resistance of enterococci in the presence of H<sub>2</sub>S takes** 261 **place specifically with methoxy-imino cephalosporins**

262 As we can notice in Figs 3, 7 and 8, and Table 1, synergy between H<sub>2</sub>S and  
263 cephalosporins does not take place with every compound of this family of antibiotics.  
264 By performing antibiograms of a set of 20 cephalosporins, including 1<sup>st</sup> to 4<sup>th</sup> generation  
265 cephalosporins, we have observed that in the presence of H<sub>2</sub>S *E. faecalis* demonstrates a  
266 significant susceptibility against cefotaxime, ceftriaxone, cefuroxime, cefpodoxime and  
267 ceftizoxime (Table 2). These drugs, frequently used in clinical settings, contain a  
268 common methoxy-imino group in their structure (Fig 9), which is not present in other

269 cephalosporins within the family, suggesting that this motif might be a key in the  
270 synergy displayed between H<sub>2</sub>S and cephalosporins.

271

272 **Table 2. Antibigrams of *E. faecalis* V583 strain, in the presence and absence of NaHS 0.1**  
273 **grams.**

|     |                       | TSA | H <sub>2</sub> S 0.1 g |
|-----|-----------------------|-----|------------------------|
|     | Cefaclor 30           | 10  | 13                     |
| 275 | Cefadroxil 30         | 13  | 13                     |
|     | Cephalexin 30         | 8   | 8                      |
| 276 | Cefalotin 30          | 16  | 16                     |
|     | Cefamandole 30        | 14  | 15                     |
|     | Cefazolin 30          | 14  | 16                     |
| 277 | Cefepime 30           | 13  | 15                     |
|     | <u>Cefotaxime 30</u>  | 6   | 21                     |
| 278 | Cefotetan 30          | 6   | 6                      |
|     | Cefoxitin 30          | 6   | 6                      |
|     | Cefpirome 30          | 22  | 25                     |
| 279 | <u>Cefpodoxime 10</u> | 6   | 20                     |
|     | Cefprozil 30          | 21  | 23                     |
| 280 | Cefradine 30          | 12  | 13                     |
|     | Cefsulodin 30         | 6   | 6                      |
|     | <u>Ceftizoxime 30</u> | 6   | 16                     |
| 281 | <u>Ceftriaxone 30</u> | 6   | 16                     |
|     | <u>Cefuroxime 30</u>  | 6   | 20                     |

282 Methoxy-imino cephalosporins are underlined.

283

## 284 H<sub>2</sub>S and cephalosporins kill enterococci

285 Finally, to further characterize the H<sub>2</sub>S-cephalosporins synergy, *E. faecalis* JH2-2 was  
286 grown in liquid media in the presence and absence of H<sub>2</sub>S and/or cefotaxime (CTX).

287 By performing a Two-way ANOVA ( $\alpha = 0.05$ ;  $P < 0.001$ ;  $F = 68,46$ ;  $df = 17, 28$ ) and a  
288 post-hoc Tukey–Kramer analysis, used for single-step multiple comparison of all pair of  
289 means, we observed that there is a strong synergistic effect between H<sub>2</sub>S and CTX ( $P <$

0.001), not only by inhibiting bacterial growth in the presence of both compounds, but also by producing a bactericidal effect (Fig 10, S4 Table). With this analysis we confirmed that, in the concentration range used in our study, H<sub>2</sub>S does not affect bacterial growth on its own. Even if enterococci were resistant to cephalosporins, a minor effect of cefotaxime on bacterial growth was noticeable, but this is something that could be observed with many antibiotic discs in antibiograms or other antibiotic susceptibility tests.

Preliminary experiments with cefaclor, a non-methoxy-imino cephalosporin, or with nalidixic acid, a quinolone against which *E. faecalis* is resistant, showed no synergy with H<sub>2</sub>S (data not shown), indicating that the displayed phenotype is specific of certain antibiotics.

301

## 302 **The persulfidome analysis of *E. faecalis* reveals potential targets for H<sub>2</sub>S**

We carried out random transposition mutagenesis of *Enterococcus* under cephalosporin selective pressure, constructing a high-density transposon mutant library. However, no mutants were obtained using this approach. This suggests that a single gene alteration is not enough to prevent resistance reversion, or that this alteration has to take place in an essential gene. Therefore we wanted to address posttranslational changes of the protein that are induced by H<sub>2</sub>S.

Signaling by H<sub>2</sub>S is now widely linked to an oxidative posttranslational modification of cysteine residues (RSH) called persulfidation (RSSH) (alternatively S-sulphydration) [27–29]. Exposure of cells to H<sub>2</sub>S results in an increase of protein persulfidation [27,30]. We performed biotin-tagging assay (BTA) to extract total persulfidated

313 proteins [31,32]. As shown in Fig 11, an increase of protein persulfidation could be  
314 observed in bacteria treated with H<sub>2</sub>S.

315 The proteins were subjected to electrophoretic separation, followed by trypsin digestion  
316 and LC/MS/MS analysis. 66 cysteine-containing proteins were identified as  
317 persulfidated (Table 3, S7 Table). Among them, peptide ABC transporters, as well as  
318 proteins of unknown function are potential targets of H<sub>2</sub>S. Despite not being  
319 quantitative, to best of our knowledge, this is the first report of a persulfidome in  
320 bacteria. Further studies will be needed to determine the protein, or combination of  
321 proteins, that are responsible for the susceptibilization of enterococci to cephalosporins  
322 when exposed to H<sub>2</sub>S.

323

324

325

326

327

328

329

330

331

332

333 **Table 3. Persulfidome of *E. faecalis*.** List of proteins of *E. faecalis* JH2-2 detected to interact  
334 with H<sub>2</sub>S.

335

| Accession | Gene   | Description                                            |
|-----------|--------|--------------------------------------------------------|
| Q833I9    | EF1963 | Phosphoglycerate kinase                                |
| Q839G8    | EF0201 | Elongation factor Tu                                   |
| Q834N1    | EF1613 | Formate acetyltransferase                              |
| Q836Q8    | EF1050 | DNA-binding response regulator                         |
| Q833I8    | EF1964 | Glyceraldehyde-3-phosphate dehydrogenase               |
| H7C7A0    | EF2739 | Alkyl hydroperoxide reductase, C subunit               |
| Q837D6    | EF0907 | Peptide ABC transporter, peptide-binding protein       |
| Q82ZF4    | EF3106 | Peptide ABC transporter, peptide-binding protein       |
| P23530    | EF0710 | Phosphoenolpyruvate-protein phosphotransferase         |
| Q839G9    | EF0200 | Elongation factor G                                    |
| Q833J0    | EF1962 | Triosephosphate isomerase                              |
| Q831U9    | EF2398 | 30S ribosomal protein S2                               |
| Q836C4    | EF1191 | DegV family protein                                    |
| Q839C1    | EF0255 | L-lactate dehydrogenase 1                              |
| Q836R2    | EF1046 | Pyruvate kinase                                        |
| Q836Z4    | EF0949 | Phosphotransacetylase                                  |
| Q837P9    | EF0784 | S-adenosylmethionine synthase                          |
| Q830Z3    | EF2621 | Uncharacterized protein                                |
| Q834N3    | EF1611 | Probable manganese-dependent inorganic pyrophosphatase |
| Q834M9    | EF1616 | CoA-binding domain protein                             |
| Q839E0    | EF0232 | 30S ribosomal protein S11                              |
| Q838R7    | EF0368 | Aspartokinase                                          |
| Q836Q9    | EF0149 | 6-phosphogluconate dehydrogenase, decarboxylating      |
| Q839G1    | EF0209 | 50S ribosomal protein L2                               |
| Q836D3    | EF1182 | S-ribosylhomocysteine lyase                            |
| Q831S5    | EF2425 | Phosphoglucomutase/phosphomannomutase family protein   |
| Q834S3    | EF1560 | Uncharacterized protein                                |
| Q839H1    | EF0198 | 30S ribosomal protein S12                              |
| Q837F1    | EF0891 | Aminotransferase                                       |
| Q830Z2    | EF2622 | Uncharacterized protein                                |
| Q82ZJ2    | EF3064 | Polyribonucleotide nucleotidyltransferase              |
| Q82Z22    | EF3257 | Oxidoreductase, pyridine nucleotide-disulfide family   |
| Q838N8    | EF0401 | Pyrrolidone-carboxylate peptidase                      |
| Q835M1    | EF1356 | Dihydrolipoyl dehydrogenase                            |
| Q834H1    | EF1681 | Peptide methionine sulfoxide reductase MsrA            |
| Q831A3    | EF2610 | ATP synthase subunit alpha                             |
| Q839I7    | EF0178 | ABC transporter, ATP-binding protein                   |
| Q835V2    | EF1270 | Ribosome maturation factor RimP                        |
| Q830B1    | EF2882 | Malonyl CoA-acyl carrier protein transacylase          |
| Q834A7    | EF1763 | Protein translocase subunit SecA                       |
| Q830Y0    | EF2638 | Redox-sensing transcriptional repressor Rex 1          |
| Q839I2    | EF0185 | Phosphopentomutase                                     |
| P37710    | EF0799 | Autolysin                                              |

336



|               |        |                                                         |     |
|---------------|--------|---------------------------------------------------------|-----|
| <b>Q82Z74</b> | EF3198 | Lipoprotein, YaeC family                                | 337 |
| <b>Q835J8</b> | EF1379 | Alanine--tRNA ligase                                    |     |
| <b>Q831F9</b> | EF2550 | Serine hydroxymethyltransferase                         | 338 |
| <b>Q820V4</b> | EF0283 | 3-oxoacyl-[acyl-carrier-protein] synthase 2             |     |
| <b>Q838J4</b> | EF0453 | OsmC/Ohr family protein                                 | 339 |
| <b>Q836Y7</b> | EF0957 | Glycosyl hydrolase, family 65                           | 340 |
| <b>Q837E3</b> | EF0900 | Aldehyde-alcohol dehydrogenase                          |     |
| <b>Q831K3</b> | EF2501 | Arsenate reductase, putative                            |     |
| <b>Q837Y9</b> | EF0685 | Foldase protein PrsA                                    |     |
| <b>Q839D9</b> | EF0233 | DNA-directed RNA polymerase subunit alpha               |     |
| <b>Q834G9</b> | EF1684 | DegV family protein, putative                           |     |
| <b>P37061</b> | EF1586 | NADH oxidase                                            |     |
| <b>Q835J3</b> | EF1384 | Phosphatidylglycerol lysyltransferase                   |     |
| <b>Q836R3</b> | EF1045 | ATP-dependent 6-phosphofructokinase                     |     |
| <b>Q839E8</b> | EF0223 | 50S ribosomal protein L18                               |     |
| <b>Q831Y0</b> | EF2365 | Xanthine phosphoribosyltransferase                      |     |
| <b>Q831G0</b> | EF2549 | Uracil phosphoribosyltransferase                        |     |
| <b>Q830B2</b> | EF2879 | Acetyl-CoA carboxylase, biotin carboxyl carrier protein |     |
| <b>Q82Z92</b> | EF3178 | Peptidase, M20/M25/M40 family                           |     |
| <b>Q833K9</b> | EF1938 | Cation-transporting ATPase, E1-E2 family                |     |
| <b>Q836J5</b> | EF1116 | Phenylalanine--tRNA ligase beta subunit                 |     |
| <b>Q836H2</b> | EF1140 | Lactoylglutathione lyase                                |     |
| <b>Q837W9</b> | EF0706 | ATP-dependent Clp protease, ATP-binding subunit ClpE    |     |

---

## 341 Discussion

342 In this work we present significant progress in the study of H<sub>2</sub>S as a gasotransmitter and  
343 its link to antibiotic resistance.

344 *S. Typhimurium* is one of the classic H<sub>2</sub>S producing bacterial species, via its *phsABC*  
345 operon [18]. It is known that its capacity to reduce sulfur compounds provides  
346 *Salmonella* with a growth advantage when colonizing the digestive tract [17,33].  
347 However, the physiology and involvement of the *phsABC* operon in antibiotic  
348 resistance, which has both a significant scientific and clinical interest, is not described.

349 The aim of this study was to understand the role and co-regulation of the H<sub>2</sub>S-producing  
350 pathways in *S. Typhimurium*, its possible role in microbial ecology and its effects on  
351 other bacteria. By knocking-out the *phsABC* operon, we have found that the PHS  
352 pathway is the predominant mechanism for H<sub>2</sub>S production in this species. Other  
353 pathways may or may not be active, but the lack of the PHS pathway is not  
354 compensated by other mechanisms.

355 We have demonstrated that the *phsABC* operon is not involved in own antibiotic  
356 resistance, even though it is the main source of H<sub>2</sub>S in *S. Typhimurium*. This suggests  
357 that the modifications in antibiotic resistance previously described in this species  
358 [20,34] are not due to the H<sub>2</sub>S itself. In fact, these authors state that the accumulation of  
359 H<sub>2</sub>S in their experiments is due to either a decrease in cysteine synthesis or an increase  
360 in its catabolism. Cysteine is a well-known inducer of the Fenton reaction and the H<sub>2</sub>S-  
361 mediated augmentation of antibiotic resistance is associated with oxidative stress  
362 protection [15]. This means that H<sub>2</sub>S itself may be irrelevant for antibiotic resistance in  
363 *S. Typhimurium*, which explains the absence of differences between WT and  $\Delta phs$   
364 strains regarding every aspect we have tested (except for the production of H<sub>2</sub>S itself).

365 As we could not detect any intracellular role for H<sub>2</sub>S in *S. Typhimurium*, but we had  
 366 verified that the *phsABC* operon was used to generate large amounts of H<sub>2</sub>S, we  
 367 hypothesized that this H<sub>2</sub>S may have an extracellular effect, that is, on neighboring  
 368 bacteria. Moreover, it is known that thiosulfate is abundant in the digestive tract [17],  
 369 suggesting that the *phsABC* operon should be active.

370 When *E. faecalis* was tested, instead of observing an enhancement of antibiotic  
 371 resistance by H<sub>2</sub>S, as previously described [15,20], we observed that this gas is capable  
 372 of disrupting the intrinsic antibiotic resistance of *Enterococcus*. The MIC of cefotaxime  
 373 in *E. faecalis* was dramatically decreased and resistance to other cephalosporins was  
 374 similarly reverted, both in *E. faecalis* and *E. faecium* multiresistant enterococci,  
 375 responsible for endocarditis and septicemia in hospitals worldwide, are ranked by the  
 376 WHO among the pathogens for which effective therapies are critically needed [35]. In  
 377 addition, the use of certain antibiotics is a predisposing factor for suffering an  
 378 overgrowth and subsequent infections by *Enterococcus* [36,37]. Therefore, as  
 379 pharmacological donors of H<sub>2</sub>S have already been developed [38–41], our work gives  
 380 new hope for the treatment of enterococcal infections. H<sub>2</sub>S donor drugs could be  
 381 administered together with cephalosporins to effectively kill multidrug resistant  
 382 enterococci in patients. In addition, unraveling the mechanism of action of H<sub>2</sub>S inside  
 383 *Enterococcus* could lead to the design of molecules that emulate H<sub>2</sub>S function.

384 In any case, considering that the supply of new antibiotics to the global market is  
 385 virtually non-existent these days, the possibility of employing classical antibiotics that,  
 386 until now, were unavoidably discarded beforehand to treat multiresistant infections,  
 387 turns out encouraging in the fight against antibiotic resistance.

388

389 In our experiments, we observed that H<sub>2</sub>S exhibits bactericidal synergy with a select  
390 group of cephalosporins containing a methoxy-imino group in its structure. This residue  
391 improves the drug's stability to  $\beta$ -lactamases and improves the ability of the drug to  
392 cross the external membrane of gram-negative bacteria [42]. Clearly, these properties do  
393 not account for its efficacy in the presence of H<sub>2</sub>S, as  $\beta$ -lactamase production by  
394 *Enterococcus* is anecdotic [43]. But, interestingly, many of the studies regarding  
395 cephalosporin resistance in enterococci were obtained with this specific group of  
396 methoxy-imino cephalosporins [44–49]. Thus, H<sub>2</sub>S might be affecting some of the  
397 pathways already described for *Enterococcus* cephalosporin resistance.

398 These pathways include a penicillin-binding protein that presents low affinity to these  
399 drugs [50], the MurAA enzyme involved in peptidoglycan synthesis [47], mutations of  
400 the  $\beta$ -subunit of the RNA polymerase [49], CroR/CroS and IreK/IreP two-component  
401 systems [45,48], or alterations in the thymidylate synthesis pathway [44], among others.  
402 Still, most of these studies do not unravel the final mechanisms governing  
403 cephalosporin resistance and they suggest a common currently undescribed mechanism  
404 [47,48,51]. Besides, in our experiments we have also observed an induction of  
405 aminoglycosides susceptibility by H<sub>2</sub>S (S3 Table), which it has not been observed by  
406 other authors. Therefore, H<sub>2</sub>S could be acting through a different pathway or upstream  
407 of a common mechanism, a theory that would be also supported by the fact that no  
408 known protein involved in cephalosporin resistance has been detected in the  
409 persulfidome (Table 3). In any case, aminoglycosides constitute another group of last  
410 resort antibiotics widely used in clinical settings and for which enterococci present a  
411 modest level of intrinsic resistance [52]. It would be interesting to study in depth this  
412 additional synergy between H<sub>2</sub>S and aminoglycosides, although it has not been object of

413 study in this work, since the reversion of cephalosporin resistance in enterococci is  
414 more relevant from a clinical and microbiological perspective.

415 From an ecological perspective, it is noteworthy that, in raw meat, enterococci have  
416 been shown to successfully inhibit H<sub>2</sub>S production by sulfide-producing bacteria,  
417 presumably through enterocins or other biologically active compounds present in the  
418 supernatant [21], although no further studies have addressed this phenomenon. We have  
419 observed that, when exposed to H<sub>2</sub>S, *Enterococcus* does not acquire additional  
420 protection against antibiotics, but, in contrast, it is killed by a powerful group of  
421 antimicrobial agents, to which this species demonstrates a robust resistance. Therefore,  
422 this alteration of antibiotic resistance can explain why enterococci gain a selective  
423 advantage by blocking the H<sub>2</sub>S production of its neighbors. Enterococci constitute a  
424 small proportion of the physiological microbiota of both humans and animals [53].  
425 Thus, both *Salmonella* and *Enterococcus* are pathogens which pursue the same niche  
426 colonization as part of their pathogenesis [17,37], which explains why both species  
427 would benefit if the other one is ousted. In addition, we have demonstrated how other  
428 H<sub>2</sub>S producing species, including *Proteus vulgaris* (which also share the same  
429 ecological niche), can also be involved in this interplay between bacteria.

430 Thus, this study highlights a new role for bacterial H<sub>2</sub>S production. We show how  
431 *Salmonella* and *Proteus*, through their H<sub>2</sub>S production, can obtain an unexpected  
432 advantage for niche competition (Fig 12). Aerial interaction among bacteria has been  
433 previously revealed, but, to the best of our knowledge, this is the first report about H<sub>2</sub>S  
434 aerial communication, showing how a bacterium can exert an effect with lethal  
435 consequences on another bacterium through H<sub>2</sub>S, a gasotransmitter with vital functions  
436 and abundant in the human body and to date considered a beneficial gas for bacteria.

## 437 **Acknowledgements**

438 We thank A. Hoefer for careful reading of the manuscript and G. Moyano for his assistance in  
439 statistics. We thank Eugeny Nudler for providing us with the *E. coli* MG1655 strain.

440

## 441 **Competing interests**

442 The authors claim no conflict of interest.

443

## 444 **Funding**

445 The funders had no role in study design, data collection and analysis, decision to  
446 publish, or preparation of the manuscript.

447 DTL and LC work have been supported by a FPU PhD scholarship from the Ministry of  
448 Education of Spain (AP2012-2130 and AP2008-00586, respectively).

449 SM was funded by a FEMS long-term fellowship.

450 NM work is funded by the EvoTAR and EFFORT European projects.

451 European Commission (EC) EFFORT-613754-FP7 Bruno Gonzalez-Zorn

452 European Commission (EC) EVoTAR-282004-FP7 Bruno Gonzalez-Zorn

453 MRF acknowledges the support from ATIP-Avenir and “Investments for the future”

454 Programme IdEx Bordeaux, and the reference no. “ANR-10-IDEX-03-02”

455

456

## 457 **Authorship**

458 Conceptualization: DTL, LC, BGZ. Investigation: DTL, NM, SM. Methodology: DTL,  
459 SM, SC, BGZ, MF. Project administration: BGZ. Supervision: BGZ, MF. Writing and  
460 review: DTL, BGZ, LC, MF.

461

## 462 **Competing interests**

463 The corresponding author declares, on behalf of all authors, that there are no financial,  
464 personal or professional interests that could be construed to have influenced the work.

465

## 466 Materials and Methods

467

### 468 Strains, media and reagents

469 All experiments were performed in Tryptone-Soy Agar or Broth (TSA or TSB,  
470 respectively) purchased from Oxoid (Oxoid Ltd., UK), unless otherwise stated.  
471 Antibiotic disks were acquired from bioMérieux (bioMérieux SA, Marcy l'Etoile,  
472 France) and Oxoid. Antibiotic powder, sodium thiosulfate and other reagents were  
473 purchased from Sigma (Sigma-Aldrich Química SA, Spain). NaHS was acquired from  
474 Cayman (Cayman Chemical, USA).

475 The strains used in these experiments are listed in Table 4.

476

477 **Table 4. Bacteria used in this study.**

478

| Strain                                                              | Abbreviated name                   | Description                                                             | Reference                         |
|---------------------------------------------------------------------|------------------------------------|-------------------------------------------------------------------------|-----------------------------------|
| <b><i>Enterococcus</i></b>                                          |                                    |                                                                         |                                   |
| <i>E. faecalis</i> VE14089                                          | V583 WT                            | V583 strain cured from its plasmids                                     | Rigottier-Gois <i>et al.</i> 2011 |
| <i>E. faecalis</i> JH2-2                                            | JH2-2 WT                           | Laboratory strain                                                       | Jacob & Hobbs 1974                |
| <i>E. faecium</i> ATCC19434                                         | <i>E. faecium</i>                  | Type strain                                                             | ATCC                              |
| <b><i>Salmonella</i> Typhimurium</b>                                |                                    |                                                                         |                                   |
| <i>S. enterica enterica</i> serovar Typhimurium ATCC14028 wild type | <i>S. Typhimurium</i> WT           | Type strain                                                             | ATCC                              |
| <i>S. Typhimurium</i> $\Delta phsABC$ <i>kan</i> <sup>R</sup>       | <i>kan</i> <sup>R</sup>            | <i>phsABC</i> operon substituted with the kanamycin resistance cassette | This work                         |
| <i>S. Typhimurium</i> $\Delta phsABC$                               | <i>Aphs</i>                        | <i>phsABC</i> operon deletion mutant                                    | This work                         |
| <i>S. Typhimurium</i> $\Delta phsABC$ (pTrc99a)                     | <i>Aphs</i> (pTrc99a)              | <i>Aphs</i> mutant transformed with pTrc99a                             | This work                         |
| <i>S. Typhimurium</i> $\Delta phsABC$ (pH <sub>2</sub> S)           | <i>Aphs</i> <sup>c</sup>           | <i>Aphs</i> mutant transformed with pSB74                               | This work                         |
| <b><i>Escherichia coli</i></b>                                      |                                    |                                                                         |                                   |
| <i>E. coli</i> MG1655                                               | <i>E. coli</i> WT                  | Laboratory strain                                                       | ATCC                              |
| <i>E. coli</i> MG1655 (pH <sub>2</sub> S)                           | <i>E. coli</i> (pH <sub>2</sub> S) | MG1655 strain transformed with pSB74                                    | This work                         |



# **Other strains**

|                                        |                      |                                        |                           |
|----------------------------------------|----------------------|----------------------------------------|---------------------------|
| <i>Bacillus cereus</i> CECT193         | <i>B. cereus</i>     | Type strain                            | CECT                      |
| <i>Citrobacter freundii</i>            | <i>C. freundii</i>   | Strain I9                              | Our laboratory            |
| <i>Enterobacter cloacae</i>            | <i>E. cloacae</i>    | Strain RyC: L15                        | Our laboratory            |
| <i>Klebsiella pneumoniae</i> ATCC10031 | <i>K. pneumoniae</i> | Type strain                            | ATCC                      |
| <i>Listeria ivanovii</i> ATCC19119     | <i>L. ivanovii</i>   | Type strain                            | ATCC                      |
| <i>Proteus vulgaris</i> CECT174        | <i>P. vulgaris</i>   | Type strain                            | CECT                      |
| <i>Pseudomonas aeruginosa</i>          | <i>P. aeruginosa</i> | Strain A26                             | Our laboratory            |
| <i>Staphylococcus aureus</i> COL       | MRSA                 | Methicillin resistant <i>S. aureus</i> | Archer <i>et al.</i> 1994 |

479 **ATCC: American Type Culture Collection; CECT: Spanish Type Culture Collection.**

480

# **481 Primers used and DNA manipulation**

482 Reactives used for PCR were purchased from Biotools (Biotools, Madrid, Spain). TAQ  
483 polymerase (Biotools) or Phusion polymerase (Thermo Fisher Scientific Inc, USA) was  
484 used. PCR products were purified with the PCR purification kit (Qiagen, In.c,  
485 Chatsworth, CA). DNA was sequenced by Sanger (Secugen SL., Madrid, Spain).  
486 Plasmids were extracted with the QIAprep Miniprep and Midiprep kits.

487 Primers used are listed in S5 Table. All primers were purchased from Sigma-Aldrich.

488

# **489 Plasmids used in this study**

490 Plasmid pTrc99a was kindly donated by Professor Javier Turnay from the Biochemistry  
491 Department of the Complutense University of Madrid. pSB74 [23] was acquired from  
492 Addgene (plasmid #19591). Plasmid pKD13 (GenBank Accession number AY048744)  
493 was used as a PCR template in order to construct the deletion mutants and it contains an  
494 FLP recombination target (FRT)-flanked kanamycin resistance (*kan*) gene. Arabinose-  
495 induced Red helper plasmid pKD46 (GenBank Accession number AY048746) was used

496 for the homologous recombination of the previously generated PCR products with the  
497 chromosome of *S. Typhimurium* ATCC14028. pCP20 FLP helper plasmid [54] was  
498 used for the elimination of the FRT-flanked resistance gene.

499 Plasmids used are listed in S6 Table.

500

## 501 **Construction of *S. Typhimurium* mutants**

502 The *S. Typhimurium phsABC* deletion mutant was constructed as previously described  
503 [55,56]. Briefly, a PCR was performed using pKD13 DNA as the for the amplification  
504 of the FRT flanked kanamycin resistance (*kan*) gene subsequently used for mutant  
505 selection (3). The 5'-terminal deletion primer had a 50-nucleotide (nt) homologous  
506 extension that includes the *phsA* initiation codon, and the 20-nt 5'-  
507 ATTCCGGGGATCCGTCGACC-3' priming site from pKD13. The 3'-terminal  
508 deletion primer consisted of a 50-nt homologous extension that includes 21 nt for the  
509 *phsC* C-terminal region, the termination codon and 29 nt downstream, and the 20-nt 5'-  
510 TGTAGGCTGGAGCTGCTTCG-3' priming site from pKD13. The PCR product  
511 obtained, containing the FRT flanked kanamycin resistance gene in between *phsA* and  
512 *phsC* homologous regions, was transformed in *S. Typhimurium* ATCC14028 carrying  
513 the thermosensitive arabinose-induced plasmid pKD46. Upon addition of arabinose,  
514 kanamycin resistant colonies (that is, those who have had their *phsABC* operon replaced  
515 by the kanamycin cassette) were selected. pCP20 FLP helper plasmid was used for the  
516 elimination of the FRT-flanked resistance gene from the  $\Delta phsABC$  deletion mutants.  
517 Correct in-frame deletion of the operon was checked with the primers *phsABC\_ext\_F*  
518 and *phsABC\_ext\_R*.

519

## 520     **Antibiograms and Minimal Inhibitory Concentration determination**

521     Antibiograms were carried out in TSA media and interpreted following official  
522     guidelines (CLSI 2017; EUCAST 2017). Minimal Inhibitory Concentrations (MIC) of  
523     *E. faecalis* and *E. faecium* were determined by using E-test (bioMérieux) on TSA  
524     media. MICs of *S. Typhimurium* were determined in TSB by the broth microdilution  
525     method following official guidelines.

526

## 527     **Measurement of H<sub>2</sub>S production**

528     Kligler media was purchased from bioMérieux. Tested strains freshly grown on TSA  
529     were inoculated on Kligler media and incubated overnight (o.n.), with the cap both tight  
530     and loose (to ensure aerobiosis conditions). Lead acetate paper strips were purchased  
531     from Sigma-Aldrich and used according to manufacturer's instructions. Briefly, peptone  
532     water (purchased from Oxoid) tubes were inoculated with the tested strains. Then,  
533     between the cap and the inner wall of the tube we placed a strip, attached with adhesive  
534     tape and above the inoculated medium, and the cap was slightly tight. Samples were  
535     incubated for 18-24 hours at 37 °C.

536

## 537     **Confrontation experiments**

538     For the confronting experiments (Fig 2), a distance of 1 cm between both bacteria was  
539     settled. To this end, 30 mL media plates were prepared, containing TSA, TSA  
540     supplemented with sodium thiosulfate (T-S) 2 or 20 mM, or TSA supplemented with  
541     cysteine (Cys) 2 mM. T-S and cysteine were prepared within the last seven days prior to  
542     the experiment. First, simulating the preparation of an antibiogram, a 0.5 McFarland

543 turbidity suspension of the H<sub>2</sub>S producing species (or its mutant) was spread evenly  
544 over the entire surface of a TSA plate, supplemented with sodium thiosulfate T-S 2  
545 mM, T-S 20 mM or Cys 2 mM prepared within the last seven days. Then, antibiograms  
546 of the strains to be tested were prepared in TSA, attending to official guidelines. Finally,  
547 lids were removed and both plates were fixed together with two pieces of adhesive tape,  
548 facing each other. The edges zone was “sealed” with air permeable Parafilm M (Bemis  
549 Company Inc, Oshkosh, WI). Plates were incubated at 37 °C for 24 hours maximum.  
550 Anaerobiosis conditions were achieved by using the GENBag system from bioMérieux.

551

## 552 **Growth curves**

553 Growth curves of *S. Typhimurium* WT and its *Δphs* mutant were performed in Lennox  
554 broth media (Conda Laboratorios, Spain), as published [15]. Briefly, from an o.n.  
555 inoculum grown at 30 °C, a 1:100 dilution was performed in fresh media and samples  
556 were grown at 37 °C to 0.7-0.8 optical density at 600 nm (O.D.). Afterwards, a 1:100  
557 dilution was carried out in 10 mL and samples were incubated at 37 °C and 150 rpm,  
558 measuring O.D. every hour. T-S 20 mM or different antibiotics were added when  
559 indicated.

560

## 561 **Experiments incubated with H<sub>2</sub>S**

562 For experiments in the presence of H<sub>2</sub>S (Fig 6), *E. faecalis* antibiograms were prepared  
563 in TSA plates following official guideline and were placed in a glass chamber of 2  
564 liters volume. Next to them, we placed the base of an empty Petri dish in which we  
565 positioned 0.1 grams of NaHS and, separated, 2 mL of ultra-pure water. Then, we

hermetically sealed the chamber and, only afterwards, NaHS and water were put in contact by gently shaking the chamber. Antibigrams were incubated for a maximum of 24 hours at 37 °C.

## Time killing experiments

10 µL from an o.n. culture of *E. faecalis* in TSB were inoculated to 15 mL glass bottles containing 10 mL of TSB. When required, antibiotics at their proper concentration were added. Bottles were incubated at 37 °C and 100 rpm. Those bottles that required H<sub>2</sub>S presence were placed in a glass hermetic chamber the same way as with experiments from the previous section (Fig 6). At 12 hours proper dilutions were plated for colony forming units (CFU) counting. From that moment on, all bottles were incubated under normal conditions until 24 hours, when dilutions were plated again.

## Random transposition mutagenesis

The library of mutants was obtained following the protocol designed by Zhang and collaborators [59]. Plasmid pZXL5 was transformed in the strain *E. faecalis* JH2-2. This thermosensitive plasmid contains: ColE and pWV01 origins of replication (for gram negative and gram positive, respectively), a *mariner* transposon (containing the *aax(6')*-*apg(2'')* gene for gentamicin resistance within), a nisin-inducible *mariner* transposase (with the system *nisK-nisR* and a chloramphenicol resistance cassette (*cat*)).

Bacteria containing pZXL5 were incubated o.n. at 28 °C in BHI media containing gentamicin 300 mg/L and chloramphenicol 10 mg/L. Afterwards, a 1:2000 dilution was carried out in fresh BHI media containing 300 mg/L and nisin 0.025 mg/L to induce the

589 random insertion of the transposon in the genome. Then, incubation of the samples at  
590 150 rpm and 37 °C in the presence of gentamicin allows the specific selection of the  
591 bacteria possessing the gentamicin resistance gene (and, therefore, the transposon) in  
592 the chromosome.

593 Afterwards, a 1:2000 dilution in fresh media containing gentamicin was performed and  
594 bacteria were incubated at 37 °C and 150 rpm o.n., obtaining a library of mutants that  
595 was stored at -80 °C for future experiments.

596 By incubating in the presence of gentamicin, cefotaxime and H<sub>2</sub>S, we attempted to  
597 select only those mutants that resisted the combined action of H<sub>2</sub>S and cefotaxime,  
598 presumably because the transposon would have interrupted a pathway key in the  
599 susceptibilization of *Enterococci*.

600

# 601 **BTA method for persulfide detection**

602 Bottles containing fresh TSB or TSB-CTX 8 µg/mL were inoculated with an o.n.  
603 inoculum of *E. faecalis* JH2-2, in a 1:1000 proportion. Samples were incubated for 5.5  
604 hours at 37 °C and 100 rpm. Then, each sample was split in two and, to one of each set,  
605 H<sub>2</sub>S 250 µM (freshly prepared as previously described) was added. The four bottles  
606 were incubated for 30 minutes at 37 °C and 100 rpm. Then, samples were centrifuged  
607 for 3 minutes at 6000 rpm and supernatant was discarded. Samples were washed once  
608 with PBS, centrifuged and supernatant discarded again. Then, each sample was mixed  
609 with 1 mL of lysis buffer, containing HENP buffer (pH 7.41), SDS 1%, 10 µL of  
610 protease inhibitor 1% and 100 µM of biotin maleimide. To ensure complete lysis,  
611 samples were sonicated (3 cycles of 1 minute at 190 MHz and 2 minutes of pause).  
612 Then, samples were incubated for 60 minutes at 37 °C.

613 After incubation, 20 mM of freshly prepared N-ethylmaleimide (NEM) was added to  
614 block the unreacted cysteines and the samples were incubated o.n. at room T<sup>a</sup> with  
615 rotating shaking. During all the procedure the lysis buffer and the samples were  
616 protected from light.

617 Proteins were precipitated with CHCl<sub>3</sub>/MeOH/H<sub>2</sub>O precipitation (1/4/4, v/v), washed  
618 twice and resuspended in HEPES buffer pH 7.4 containing SDS up to 0.5%. Samples  
619 were adjusted to equal protein concentration. Biotinylated proteins were bound to  
620 streptavidin agarose beads, and persulfidated targets eluted by DTT 0.5 mM (Fig 11).

621 Eluted proteins were either resolved by SDS electrophoresis and visualized with silver  
622 staining or subjected to in-gel trypsinization and subsequent LC/MS analysis.  
623 Experiments were performed in triplicates.

624

## 625 **nanoLC/MS**

626 Protein samples were run on SDS-PAGE (10 %) but protein separation was stopped  
627 once proteins have entered the resolving gel. After colloidal blue staining, each lane was  
628 was cut into 1 mm x 1 mm gel pieces. The gel pieces were destained in 25 mM  
629 ammonium bicarbonate 50% ACN, rinsed twice in ultrapure water and shrunk in ACN  
630 for 10 min. After ACN removal, gel pieces were dried at room temperature,  
631 carbamidomethylated and covered with the trypsin solution (10 ng/μL in 50 mM  
632 NH<sub>4</sub>HCO<sub>3</sub>), rehydrated at 4°C for 10 min, and finally incubated overnight at 37°C. The  
633 gel pieces were then incubated for 15 min in 50 mM NH<sub>4</sub>HCO<sub>3</sub> at room temperature  
634 with rotary shaking. The supernatant was collected, and an H<sub>2</sub>O/ACN/HCOOH  
635 (47.5:47.5:5) extraction solution was added onto the gel pieces for 15 min. The  
636 extraction step was repeated twice. The pooled supernatants were dried in a vacuum

centrifuge and then resuspended in 40  $\mu$ L of water acidified with 0.1% HCOOH. Peptide mixture was analyzed on an Ultimate 3000 nanoLC system (Dionex, Amsterdam, The Netherlands) coupled to an Electrospray Q-Exactive quadrupole Orbitrap benchtop mass spectrometer (Thermo Fisher Scientific, San Jose, CA). Ten microliters of peptide digests were loaded onto a 300- $\mu$ m-inner diameter x 5-mm C18 PepMap<sup>TM</sup> trap column (LC Packings) at a flow rate of 30  $\mu$ L/min. The peptides were eluted from the trap column onto an analytical 75-mm id x 15-cm C18 Pep-Map column (LC Packings) with a 4–40% linear gradient of solvent B in 108 min. Mobile phases were a mix of solvent A (0.1% formic acid in 5% ACN) and solvent B (0.1% formic acid in 80% ACN). The separation flow rate was set at 300 nL/min. The mass spectrometer operated in positive ion mode at a 1.9-kV needle voltage. Data were acquired using Xcalibur 2.2 software in a data-dependent mode. MS scans ( $m/z$  300–2000) were recorded at a resolution of  $R = 70000$  (@  $m/z$  200) and an automatic gain control (AGC) target of  $3 \times 10^6$  ions collected within 100 ms. Dynamic exclusion was set to 30 s and the top 12 ions were selected from fragmentation in higher-energy collisional dissociation (HCD) mode. MS/MS scans with a target value of  $1 \times 10^5$  ions were collected with a maximum fill time of 120 ms and a resolution of  $R = 35000$ . Additionally, only +2 and +3 charged ions were selected for fragmentation. Other settings were as follows: neither sheath nor auxiliary gas flow; heated capillary temperature, 270°C; normalized HCD collision energy of 27% and an isolation width of 2  $m/z$ .

## Database search and results processing

Data were searched by SEQUEST through Proteome Discoverer 1.4 (Thermo Fisher Scientific Inc.) against a subset of the 2017-03 version of UniProt database restricted to



662 *Enterococcus faecalis* Reference Proteome Set (3240 entries). Spectra from peptides  
 663 higher than 5000 Da or lower than 350 Da were rejected. The search parameters were as  
 664 follows: mass accuracy of the monoisotopic peptide precursor and peptide fragments  
 665 was set to 10 ppm and 0.02 Da respectively. Only b- and y-ions were considered for  
 666 mass calculation. Oxidation of methionines (+16 Da) was considered as variable  
 667 modification and carbamidomethylation of cysteines (+57 Da) as fixed modification.  
 668 Two missed trypsin cleavages were allowed. Peptide validation was performed using  
 669 Percolator algorithm [60] and only “high confidence” peptides were retained  
 670 corresponding to a 1% False Positive Rate at peptide level.  
 671

## 672 **Statistical analysis**

673 The statistical analysis for this paper was generated using SAS software Pre-production  
 674 version 9.0 (SAS Institute Inc., Cary, NC, USA).

675

## 676 **Figure captions**

### 677 **Fig 1. Characterization of the *S. Typhimurium phsABC* operon.**

678 (A) PCR showing substitution of the operon by the kanamycin cassette, and subsequent deletion  
679 of this cassette. (B) H<sub>2</sub>S production, measured in Kligler media in the absence (upper line) or  
680 the presence (bottom line) of thiosulfate 20 mM (C) or in peptone water broth by lead acetate  
681 strips.

682

### 683 **Fig 2. Confronting experiments.**

684 An antibiogram of the species to be tested is exposed to another plate streaked with an H<sub>2</sub>S  
685 producing species and supplemented with thiosulfate 20 mM (T-S).

686

### 687 **Fig 3. Confronting experiments of *E. faecalis*.**

688 Control antibiograms and confronting experiments of *E. faecalis* JH2-2 (plated on TSA media)  
689 faced with *S. Typhimurium* ATCC14028, *E. coli* (pH<sub>2</sub>S), *Proteus vulgaris* CECT174. H<sub>2</sub>S  
690 producing species were plated on TSA media containing T-S 20 mM. Antibiotics tested:  
691 cloramphenicol (C), vancomycin (VAN), tetracycline (TET), sulphametoxazol-trimethoprim  
692 (SXT), clindamycin (CMN), rifampin (RA), ciprofloxacin (CIP), streptomycin (S), nalidixic  
693 acid (NA), gentamicin (GMN), amoxicillin (AMX), aztreonam (ATM), cefotaxime (CTX),  
694 cefuroxime (CXM), ertapenem (ETP), cefotetan (CTT). Antibiotics showing synergy with H<sub>2</sub>S  
695 are highlighted.

696

### 697 **Fig 4. Minimal Inhibitory Concentration of *E. faecalis* confronted with *S. Typhimurium*.**

698 MIC for cefotaxime (TX) of *E. faecalis* JH2-2 control strain (left), confronted with *S.*  
699 Typhimurium WT (center) and with *S. Typhimurium*  $\Delta phs$  (right).

700

701 **Fig 5. H<sub>2</sub>S production by *E. coli* WT and *E. coli* p(H<sub>2</sub>S).**

702 H<sub>2</sub>S production was measured with Kligler media (left) and lead acetate strips (right).

703

704 **Fig 6. Method for incubation with chemical H<sub>2</sub>S.**

705 Samples were placed in a chamber, and next to it the NaHS stone (represented as a star) was  
706 placed on an empty Petri dish alongside 2 mL of ultrapure water (dashed blue area); after  
707 sealing the chamber, it is gently shaken to release the H<sub>2</sub>S to the atmosphere upon contact with  
708 H<sub>2</sub>O (B). CTX: cefotaxime.

709

710 **Fig 7. Antibigrams of *E. faecalis* in the presence of H<sub>2</sub>S.**

711 *E. faecalis* V583 was incubated in a chamber in the presence and absence of NaHS 0.1 grams,  
712 for the antibiotics cefotaxime (CTX), cefuroxime (CXM), ceftizoxime (ZOX), cefotetan (CTT)  
713 and cefpodoxime (CPD).

714

715 **Fig 8. Antibigrams of *E. faecium* in the presence of H<sub>2</sub>S.**

716 *E. faecium* ATCC19434 was incubated in a chamber in the absence (left) and the presence  
717 (right) of 0.1 grams of NaHS, for the antibiotics cefotaxime (CTX), cefuroxime (CXM),  
718 ceftizoxime (ZOX), cefotetan (CTT) and cefpodoxime (CPD).

719

720 **Fig 9. Chemical structure of cephalosporins.**

721 In cefotaxime the methoxy-imino residue is emphasized.

722

723 **Fig 10. *E. faecalis* time killing curves.**

724 *E. faecalis* JH2-2 strain was incubated in TSB liquid media in the presence and absence of  
725 NaHS (in the atmosphere) and/or cefotaxime (CTX). Dilutions were plated at 0, 12 and 24 hours  
726 for Colony Forming Units (CFU) counting. Error bars represent the standard error of at least  
727 three independent experiments. Significant differences among samples are indicated as a, b, c, d.  
728 Samples with the same letter are not statistically different among them.

729

730 **Fig 11. Identification of the complete persulfidome of *E. faecalis***

731 (A) Workflow used for the specific labeling of persulfide residues. Biotin maleimide binds only  
732 to thiol and persulfide motifs. Bound proteins are separated from others by streptavidin  
733 magnetic beads. DTT treatment specifically cleaves disulfide bridges with biotin maleimide,  
734 rendering the original S-sulfhydrated proteins available for subsequent procedures. (B) SDS-  
735 PAGE of *E. faecalis* total protein extraction incubated in the presence and absence of H<sub>2</sub>S and  
736 CTX.

737

738 **Fig 12. Niche competition of *Enterococcus* and H<sub>2</sub>S-producing bacteria**

739 The use of cephalosporins or other antibiotics to which *E. faecalis* and *E. faecium* are resistant  
740 promotes these species overgrowth in the host's digestive tract, facilitating their dissemination  
741 and the development of enterococcal infections (upper panel). Nevertheless, a cephalosporin-  
742 resistant *S. Typhimurium* strain in the niche could induce the killing of enterococci by H<sub>2</sub>S  
743 production, displacing the latter and colonizing the gut as a previous step for infection (bottom  
744 panel).

745

746

747

748

## 749 **References**

- 750 1. Papenfort K, Bassler BL. Quorum sensing signal-response systems in Gram-negative bacteria. *Nat Rev*  
751 *Micro.* Nature Publishing Group, a division of Macmillan Publishers Limited. All Rights Reserved.; 2016  
752 Sep;14(9):576–88.
- 753 2. Heal RD, Parsons AT. Novel intercellular communication system in *Escherichia coli* that confers antibiotic  
754 resistance between physically separated populations. *J Appl Microbiol.* 2002;92(6):1116–22.
- 755 3. Bernier SP, Létoffé S, Delepierre M, Ghigo JM. Biogenic ammonia modifies antibiotic resistance at a  
756 distance in physically separated bacteria. *Mol Microbiol.* 2011;81(3):705–16.
- 757 4. Létoffé S, Audrain B, Bernier SP, Delepierre M, Ghigo J. Aerial Exposure to the Bacterial Volatile  
758 Compound Trimethylamine Modifies Antibiotic Resistance of Physically Separated Bacteria by.  
759 2014;5(1):1–12.
- 760 5. Chen Y, Gozz K, Yan F, Chai Y. Acetic acid acts as a volatile signal to stimulate bacterial biofilm  
761 formation. *MBio.* 2015;6(3):1–13.
- 762 6. Wang RUI. Two 's company , three ' s a crowd : can H<sub>2</sub>S be the third endogenous gaseous transmitter ?  
763 *Faseb J.* 2002;16(13):1792–8.
- 764 7. Attene-Ramos MS. Evidence That Hydrogen Sulfide Is a Genotoxic Agent. *Mol Cancer Res.* 2006;4(1):9–  
765 14.
- 766 8. Ryter SW, Morse D, Choi AMK. Carbon Monoxide: To Boldly Go Where NO Has Gone Before. *Science*  
767 (80- ). 2004;27(April):208–33.
- 768 9. Yang G, Wu L, Jiang B, Yang W, Qi J, Cao K, et al. H<sub>2</sub>S as a physiologic vasorelaxant: hypertension in  
769 mice with deletion of cystathionine gamma-lyase. *Science.* 2008;322(5901):587–90.
- 770 10. Li Q, Lancaster JR. Chemical foundations of hydrogen sulfide biology. *Nitric Oxide.* Elsevier Inc.;  
771 2013;35(July):21–34.
- 772 11. Zhao K, Ju Y, Li S, Altaany Z, Wang R, Yang G. S-sulphydration of MEK1 leads to PARP-1 activation and  
773 DNA damage repair. 2014;15(7):792–800.
- 774 12. Revsbech IG, Shen X, Chakravarti R, Jensen FB, Thiel B, Evans AL, et al. Hydrogen sulfide and nitric oxide  
775 metabolites in the blood of free-ranging brown bears and their potential roles in hibernation. *Free Radic Biol*  
776 *Med.* Elsevier; 2014;73:349–57.
- 777 13. Ni Z-J, Hu K-D, Song C-B, Ma R-H, Li Z-R, Zheng J-L, et al. Hydrogen Sulfide Alleviates Postharvest  
778 Senescence of Grape by Modulating the Antioxidant Defenses. *Oxid Med Cell Longev.* 2016;2016:1–14.
- 779 14. Gusarov I, Shatalin K, Starodubtseva M, Nudler E. Endogenous Nitric Oxide Protects Bacteria Against a  
780 Wide Spectrum of Antibiotics. *Science* (80- ). 2009;325(5946):1380–4.
- 781 15. Shatalin K, Shatalina E, Mironov A, Nudler E. H<sub>2</sub>S: a universal defense against antibiotics in bacteria.

782 Science (80- ). 2011;334(6058):986–90.

783 16. Clarke PH. Hydrogen Sulphide Production by Bacteria. J Gen Microbiol. 1953;8(3):397–407.

784 17. Winter SE, Thiennimitr P, Winter MG, Butler BP, Huseby DL, Crawford RW, et al. Gut inflammation  
785 provides a respiratory electron acceptor for *Salmonella*. Nature. 2010;467(7314):426–9.

786 18. Heinzinger NK, Fujimoto SY, Clark MA, Moreno MS, Barrett EL. Sequence analysis of the phs operon in  
787 *Salmonella typhimurium* and the contribution of thiosulfate reduction to anaerobic energy metabolism. J  
788 Bacteriol. 1995;177(10):2813–20.

789 19. Álvarez R, Frávega J, Rodas PI, Fuentes JA, Paredes-Sabja D, Calderón IL, et al. Participation of S.  
790 Typhimurium cysJIH Operon in the H<sub>2</sub>S-mediated Ciprofloxacin Resistance in Presence of Sulfate as Sulfur  
791 Source. Antibiotics. 2015;4(3):321–8.

792 20. Frávega J, Álvarez R, Díaz F, Inostroza O, Tejías C, Rodas PI, et al. *Salmonella Typhimurium* exhibits  
793 fluoroquinolone resistance mediated by the accumulation of the antioxidant molecule H<sub>2</sub>S in a CysK-  
794 dependent manner. J Antimicrob Chemother. 2016;

795 21. Liu X, Gong C, Jiang X. Inhibitory effects of enterococci on the production of hydrogen sulfide by hydrogen  
796 sulfide-producing bacteria in raw meat. J Appl Microbiol. 2011;111(1):83–92.

797 22. Barrett EL, Clark MA. Tetrathionate reduction and production of hydrogen sulfide from thiosulfate.  
798 Microbiol Rev. 1987;51(2):192–205.

799 23. Bang SW, Clark DS, Keasling JD. Engineering hydrogen sulfide production and cadmium removal by  
800 expression of the thiosulfate reductase gene (phsABC) from *Salmonella enterica* serovar typhimurium in  
801 *Escherichia coli*. Appl Environ Microbiol. 2000;66(9):3939–44.

802 24. Wu F, Xu X, Xie J, Yi S, Wang J, Yang X, et al. Molecular characterization of *Salmonella enterica* serovar  
803 Aberdeen negative for H<sub>2</sub>S production in China. PLoS One. 2016;11(8):1–11.

804 25. Módos K, Panopoulos P, Coletta C, Papapetropoulos A, Szabo C. Hydrogen sulfide-mediated stimulation of  
805 mitochondrial electron transport involves inhibition of the mitochondrial phosphodiesterase 2A, elevation of  
806 cAMP and activation of protein kinase A. Biochem Pharmacol. 2013;86(9):1311–9.

807 26. Rice LB. Federal Funding for the Study of Antimicrobial Resistance in Nosocomial Pathogens: No  
808 ESKAPE. J Infect Dis. 2008;197(8):1079–81.

809 27. Zhang D, Macinkovic I, Devarie-Baez NO, Pan J, Park CM, Carroll KS, et al. Detection of protein S-  
810 sulfhydration by a tag-switch technique. Angew Chemie (International ed.in English). Department of  
811 Chemistry, Washington State University, Pullman, WA 99164 (USA).: WILEY-VCH Verlag GmbH & Co.  
812 KGaA, Weinheim; 2014;53(2):575–81.

813 28. Moore PK, Whiteman M, Moore PK. Chemistry, Biochemistry and Pharmacology of Hydrogen Sulfide. Vol.  
814 230, Hand. Exp. Pharmacol. 2015. 395 p.

815 29. Paul BD, Snyder SH. H<sub>2</sub>S: A Novel Gasotransmitter that Signals by Sulfhydration. Trends Biochem Sci.  
816 Elsevier Ltd; 2015;xx:1–14.

- 817 30. Wedmann R, Onderka C, Wei S, András Sziártó I, Miljkovic J, Femic A, et al. Improved Tag-Switch  
818 Method Reveals that Thioredoxin Acts as Depersulfidase and Controls the Intracellular Levels of Protein  
819 Persulfidation. *Chem Sci*. 2016;3414–26.
- 820 31. Cuevasanta E, Lange M, Bonanata J, Coitiño EL, Ferrer-Sueta G, Filipovic MR, et al. Reaction of hydrogen  
821 sulfide with disulfide and Sulfenic acid to form the strongly Nucleophilic Persulfide. *J Biol Chem*.  
822 2015;290(45):26866–80.
- 823 32. Gao XH, Krokowski D, Guan BJ, Bederman I, Majumder M, Parisien M, et al. Quantitative H<sub>2</sub>S-mediated  
824 protein sulphydration reveals metabolic reprogramming during the integrated stress response. *Elife*.  
825 2015;4(NOVEMBER2015):1–21.
- 826 33. Bäumlér AJ, Sperandio V. Interactions between the microbiota and pathogenic bacteria in the gut. *Nature*.  
827 2016;535(7610):85–93.
- 828 34. Álvarez R, Neumann G, Frávega J, Díaz F, Tejías C, Collao B, et al. CysB-dependent upregulation of the  
829 *Salmonella Typhimurium* cysJH operon in response to antimicrobial compounds that induce oxidative  
830 stress. *Biochem Biophys Res Commun*. 2015;458(1):46–51.
- 831 35. Tacconelli E, Magrini N, Carmeli Y, Harbarth S, Kahlmeter G, Kluytmans J, et al. Global priority list of  
832 antibiotic-resistant bacteria to guide research, discovery, and development of new antibiotics. *World Heal*  
833 *Organ*. 2017;
- 834 36. Ubeda C, Taur Y, Jenq RR, Equinda MJ, Son T, Samstein M, et al. Vancomycin-resistant *Enterococcus*  
835 domination of intestinal microbiota is enabled by antibiotic treatment in mice and precedes bloodstream  
836 invasion in humans. *J Clin Invest*. Infectious Diseases Service, Department of Medicine, Memorial Sloan-  
837 Kettering Cancer Center, New York, New York, USA. [ubedamoc@mskcc.org](mailto:ubedamoc@mskcc.org); 2010;120(12):4332–41.
- 838 37. Hendrickx APA, Top J, Bayjanov JR, Kemperman H, Rogers MRC, Paganelli FL, et al. Antibiotic-driven  
839 dysbiosis mediates intraluminal agglutination and alternative segregation of *enterococcus faecium* from the  
840 intestinal epithelium. *MBio*. 2015;6(6):1–11.
- 841 38. Li L, Whiteman M, Guan YY, Neo KL, Cheng Y, Lee SW, et al. Characterization of a novel, water-soluble  
842 hydrogen sulfide-releasing molecule (GYY4137): new insights into the biology of hydrogen sulfide.  
843 *Circulation*. Department of Pharmacology, National University of Singapore, Singapore; 2008 May  
844 6;117(18):2351–60.
- 845 39. Ahmad A, Olah G, Szczesny B, Wood ME, Whiteman M, Szabo C. AP39, a mitochondrially targeted  
846 hydrogen sulfide donor, exerts protective effects in a rat model of renal ischemia–reperfusion. *Nitric Oxide*.  
847 2015;47(2015):S43.
- 848 40. Gero D, Torregrossa R, Perry A, Waters A, Le-Trionnaire S, Whatmore JL, et al. The novel mitochondria-  
849 targeted hydrogen sulfide (H<sub>2</sub>S) donors AP123 and AP39 protect against hyperglycemic injury in  
850 microvascular endothelial cells in vitro. *Pharmacol Res*. 2016;113:186–98.
- 851 41. Nußbaum BL, Vogt J, Wachter U, McCook O, Wepler M, Matallo J, et al. Metabolic, cardiac and renal  
852 effects of the slow hydrogen sulfide-releasing molecule GYY4137 during resuscitated septic shock in swine  
853 with pre-existing coronary artery disease. *Shock*. 2017;33(5):519–25.



- 854 42. Nikaido H, Liu W, Rosenberg EY. Outer membrane permeability and  $\beta$ -lactamase stability of dipolar ionic  
855 cephalosporins containing methoxyimino substituents. *Antimicrob Agents Chemother.* 1990;34(2):337–42.
- 856 43. ECDC. Antimicrobial Resistance surveillance in Europe. 2015. 9-32 p.
- 857 44. Hoff JS, Kristich CJ. Thymidylate Limitation Potentiates Cephalosporin Activity toward Enterococci via an  
858 Exopolysaccharide-Based Mechanism. *ACS Chem Biol.* 2016;11(6):1561–8.
- 859 45. Kristich CJ, Little JL, Hall CL, Hoff JS. Reciprocal regulation of cephalosporin resistance in *Enterococcus*  
860 *faecalis*. *MBio.* Department of Microbiology and Molecular Genetics, Center for Infectious Disease  
861 Research, Medical College of Wisconsin, Milwaukee, Wisconsin, USA. ckristich@mcw.edu; 2011 Nov  
862 1;2(6):e00199-11.
- 863 46. Hall CL, Tschannen M, Worthey EA, Kristich CJ. IreB, a Ser/Thr kinase substrate, influences antimicrobial  
864 resistance in *Enterococcus faecalis*. *Antimicrob Agents Chemother.* 2013;57(12):6179–86.
- 865 47. Vesic D, Kristich CJ. MurAA is required for intrinsic cephalosporin resistance of *Enterococcus faecalis*.  
866 *Antimicrob Agents Chemother.* Department of Microbiology and Molecular Genetics, Center for Infectious  
867 Disease Research, Medical College of Wisconsin, Milwaukee, Wisconsin, USA.; 2012 May;56(5):2443–51.
- 868 48. Kellogg SL, Kristich CJ. Functional dissection of the CroRS two-component system required for resistance  
869 to cell wall stressors in *Enterococcus faecalis*. *J Bacteriol.* 2016;198(8):1326–36.
- 870 49. Kristich CJ, Little JL. Mutations in the beta subunit of RNA polymerase alter intrinsic cephalosporin  
871 resistance in Enterococci. *Antimicrob Agents Chemother.* Department of Microbiology and Molecular  
872 Genetics, Center for Infectious Disease Research, Medical College of Wisconsin, Milwaukee, Wisconsin,  
873 USA. ckristich@mcw.edu; 2012;56(4):2022–7.
- 874 50. Sifaoui F, Arthur M, Rice L, Gutmann L. Role of penicillin-binding protein 5 in expression of ampicillin  
875 resistance and peptidoglycan structure in *Enterococcus faecium*. *Antimicrob Agents Chemother.* L.R.M.A.,  
876 INSERM E0004, Universite Paris VI, 75270 Paris Cedex 06, France.; 2001 Sep;45(9):2594–7.
- 877 51. Desbonnet C, Tait-Kamradt A, Garcia-Solache M, Dunman P, Coleman J, Arthur M, et al. Involvement of  
878 the eukaryote-like kinase-phosphatase system and a protein that interacts with penicillin-binding protein 5 in  
879 emergence of cephalosporin resistance in cephalosporin-sensitive class A penicillin-binding protein mutants  
880 in *Enterococcus faeci*. *MBio.* 2016;7(2):1–10.
- 881 52. Hollenbeck BL, Rice LB. Intrinsic and acquired resistance mechanisms in enterococcus. *Virulence.*  
882 2012;3(5):421–33.
- 883 53. Svec P, Devriese L. *Enterococcus*. In: *Bergey's Manual of Systematics of Archaea and Bacteria.* Bergey's  
884 Manual Trust; 2015. p. 1–25.
- 885 54. Cherepanov PP, Wackernagel W. Gene disruption in *Escherichia coli*: TcR and KmR cassettes with the  
886 option of Flp-catalyzed excision of the antibiotic-resistance determinant. *Gene.* 1995;158(1):9–14.
- 887 55. Datsenko KA, Wanner BL. One-step inactivation of chromosomal genes in *Escherichia coli* K-12 using PCR  
888 products. *Proc Natl Acad Sci U S A.* Department of Biological Sciences, Purdue University, West Lafayette,  
889 IN 47907, USA.; 2000 Jun 6;97(12):6640–5.

890 56. Baba T, Ara T, Hasegawa M, Takai Y, Okumura Y, Baba M, et al. Construction of Escherichia coli K-12 in-  
891 frame, single-gene knockout mutants: the Keio collection. Mol Syst Biol. Institute for Advanced  
892 Biosciences, Keio University, Tsuruoka City, Yamagata, Japan.; 2006;2:2006.0008.

893 57. [CLSI] Clinical Laboratory Standards Institute. Performance Standards for Antimicrobial Susceptibility  
894 Testing. 27th ed. CLSI supplement M100. 27th ed. Vol. fifteenth. 2017. 1-256 p.

895 58. The European Committee on Antimicrobial Susceptibility Testing. Breakpoint tables for interpretation of  
896 MICs and zone diameters. Version 7.0. 2017.

897 59. Zhang X, Paganelli FL, Bierschenk D, Kuipers A, Bonten MJ, Willems RJ, et al. Genome-wide  
898 identification of ampicillin resistance determinants in Enterococcus faecium. PLoS Genet. Department of  
899 Medical Microbiology, University Medical Center Utrecht, Utrecht, The Netherlands.; 2012  
900 Jun;8(6):e1002804.

901 60. Käll L, Canterbury JD, Weston J, Noble WS, MacCoss MJ. Semi-supervised learning for peptide  
902 identification from shotgun proteomics datasets. Nat Methods. 2007;4(11):923–5.

903

904

## 905     **Supplementary material**

906

### 907     **S1 Fig. *S. Typhimurium* WT and *Aphs* growth curves.**

908     Experiments were carried out both in the presence and absence of thiosulfate (T-S) 20 mM (A) and in the  
 909     presence of ampicillin 0.5 mg/L (B). The error bars represent the standard error of three independent  
 910     experiments. Minimal Inhibitory Concentrations of different antibiotics (C). The results show the mean of  
 911     three independent experiments.

912

913 **S1 Table. Antibigrams of *Salmonella* Typhimurium WT and  $\Delta phs$  strain, in Tryptone Soy Agar**  
 914 **(TSA), in the presence and absence of thiosulfate 20 mM (T-S).**

915

| 916 |                                   | <b><i>S. Typhimurium</i></b><br><b>WT</b> |                 | <b><i>S. Typhimurium</i></b><br><b><math>\Delta phs</math></b> |                 |
|-----|-----------------------------------|-------------------------------------------|-----------------|----------------------------------------------------------------|-----------------|
|     |                                   | TSA                                       | TSA +<br>T-S 20 | TSA                                                            | TSA +<br>T-S 20 |
| 917 | <b>Amox. + Clavulanic acid 30</b> | 31                                        | 28              | 32                                                             | 29              |
|     | <b>Cefaclor 30</b>                | 31                                        | 30              | 29                                                             | 31              |
|     | <b>Cefotaxime 30</b>              | 34                                        | 34              | 34                                                             | 34              |
| 918 | <b>Cefpodoxime 10</b>             | 28                                        | 29              | 30                                                             | 27              |
| 919 | <b>Cefoxitin 30</b>               | 26                                        | 25              | 29                                                             | 25              |
|     | <b>Imipenem 10</b>                | 33                                        | 32              | 33                                                             | 32              |
| 920 | <b>Aztreonam 30</b>               | 38                                        | 34              | 34                                                             | 34              |
| 921 | <b>Apramycin 15</b>               | 13                                        | 10              | 13                                                             | 9               |
|     | <b>Gentamicin 10</b>              | 16                                        | 14              | 17                                                             | 14              |
| 922 | <b>Neomycin 30</b>                | 16                                        | 14              | 15                                                             | 13              |
| 923 | <b>Netilmicin 30</b>              | 19                                        | 17              | 19                                                             | 17              |
|     | <b>Estreptomycin 10</b>           | 12                                        | 7               | 12                                                             | 7               |
| 924 | <b>Ciprofloxacin 10</b>           | 35                                        | 37              | 35                                                             | 36              |
| 925 | <b>Sulpha - Trimetoprim 25</b>    | 29                                        | 30              | 29                                                             | 30              |
|     | <b>Tetracycline 30</b>            | 27                                        | 27              | 26                                                             | 27              |
| 926 | <b>Clindamycin 2</b>              | 6                                         | 6               | 6                                                              | 6               |
| 927 | <b>Colistin 10</b>                | 14                                        | 14              | 13                                                             | 14              |
|     | <b>Cloramphenicol 50</b>          | 25                                        | 27              | 28                                                             | 28              |
| 928 | <b>Erythromycin 15</b>            | 7                                         | 6               | 6                                                              | 7               |
| 929 | <b>Mupirocin 5</b>                | 6                                         | 6               | 6                                                              | 6               |
|     | <b>Rifampin 5</b>                 | 9                                         | 7               | 9                                                              | 9               |
| 930 | <b>Vancomycin 30</b>              | 6                                         | 6               | 6                                                              | 6               |
| 931 | <b>Fosfomycin 200</b>             | 36                                        | 30              | 33                                                             | 31              |

932

933

934

935

936

937

938

939

940

941

942  
943  
944  
945  
946  
947  
948  
949  
950  
951  
952  
953  
954  
955  
956  
957  
958  
959  
960  
961  
962  
963  
964  
965  
966  
967  
968  
969  
970  
971  
972  
973  
974

**S2 Table. Minimal Inhibitory Concentration (MIC) for different antibiotics in *S. Typhimurium* WT and its *Aphs* mutant.**

| MIC (mg/L)     | <i>S. Typhimurium</i><br>WT | <i>S. Typhimurium</i><br><i>Aphs</i> |
|----------------|-----------------------------|--------------------------------------|
| Ampicillin     | 1                           | 1                                    |
| Cefotaxime     | 0.125                       | 0.062                                |
| Streptomycin   | 128                         | 64                                   |
| Cloramphenicol | 8                           | 8                                    |
| Ciprofloxacin  | 0.031                       | 0.031                                |

975

976 **S3 Table. Antibigrams of *E. faecalis* V583 strain, in Tryptone Soy Agar (TSA), in the presence and**  
 977 **absence of NaHS 0.10 grams.**

|                                   | TSA | TSA<br>+H <sub>2</sub> S 0.10 g |
|-----------------------------------|-----|---------------------------------|
| <b>Ampicillin 10</b>              | 28  | >40                             |
| <b>Amoxicillin 25</b>             | 33  | >40                             |
| <b>Amox. + clavulanic acid 30</b> | 32  | >40                             |
| <b>Penicillin 10</b>              | 24  | 30                              |
| <b>Cefaclor 30</b>                | 10  | 12                              |
| <b>Cefotaxime 30</b>              | 6   | 23                              |
| <b>Ertapenem 10</b>               | 6   | 6                               |
| <b>Imipenem 10</b>                | 29  | 37                              |
| <b>Aztreonam 30</b>               | 6   | 6                               |
| <b>Amikacin 30</b>                | 11  | 28                              |
| <b>Apramycin 15</b>               | 6   | 23                              |
| <b>Streptomycin 10</b>            | 6   | 24                              |
| <b>Gentamicin 10</b>              | 13  | 27                              |
| <b>Kanamycin 30</b>               | 11  | 28                              |
| <b>Neomycin 30</b>                | 10  | 24                              |
| <b>Tobramycin 10</b>              | 11  | 28                              |
| <b>Nalidixic acid 30</b>          | 6   | 6                               |
| <b>Norfloxacin 10</b>             | 23  | 25                              |
| <b>Sulfamethoxazol 300</b>        | 6   | 6                               |
| <b>Sulfa - Trimetoprim 25</b>     | 33  | 34                              |
| <b>Tetracyclin 30</b>             | 30  | 33                              |
| <b>Clindamycin 2</b>              | 6   | 6                               |
| <b>Cloramphenicol 50</b>          | 29  | 30                              |
| <b>Colistin 10</b>                | 6   | 6                               |
| <b>Eritromycin 15</b>             | 23  | 29                              |
| <b>Fusidic acid 5</b>             | 13  | 19                              |
| <b>Lincomycin 15</b>              | 7   | 9                               |
| <b>Mupirocin 5</b>                | 8   | 11                              |
| <b>Pristinamycin 15</b>           | 17  | 18                              |
| <b>Rifampin 5</b>                 | 18  | 19                              |
| <b>Vancomycin 30</b>              | 15  | 19                              |

978

979

980

981

982

983 **S4 Table. Tukey-Kramer post-hoc analysis results. Statistically significant results of interest are**  
 984 **highlighted.**

| TUKEY-KRAMER POST-HOC ANALYSIS |         |                  |                  |                       |                        |                        |          |                  |                  |                            |                             |                             |
|--------------------------------|---------|------------------|------------------|-----------------------|------------------------|------------------------|----------|------------------|------------------|----------------------------|-----------------------------|-----------------------------|
|                                | WT<br>0 | WT<br>12         | WT<br>24         | H <sub>2</sub> S<br>0 | H <sub>2</sub> S<br>12 | H <sub>2</sub> S<br>24 | CTX<br>0 | CTX<br>12        | CTX<br>24        | H <sub>2</sub> S-<br>CTX 0 | H <sub>2</sub> S-<br>CTX 12 | H <sub>2</sub> S-<br>CTX 24 |
| 0                              |         | <u>&lt;.0001</u> | <u>&lt;.0001</u> | 1.0000                | <.0001                 | <.0001                 | 1.0000   | <.0001           | <.0001           | 1.0000                     | 0.0081                      | 0.0004                      |
| WT 12                          |         |                  | 1.0000           | <.0001                | 0.9257                 | 0.9560                 | <.0001   | <u>0.0188</u>    | 0.0137           | <.0001                     | <u>&lt;.0001</u>            | <.0001                      |
| 24                             |         |                  |                  | <.0001                | 0.9984                 | 0.9996                 | <.0001   | 0.0670           | 0.0629           | <.0001                     | <.0001                      | <u>&lt;.0001</u>            |
| 0                              |         |                  |                  |                       | <u>&lt;.0001</u>       | <u>&lt;.0001</u>       | 1.0000   | <.0001           | <.0001           | 1.0000                     | 0.0124                      | 0.0006                      |
| H <sub>2</sub> S 12            |         |                  |                  |                       |                        | 1.0000                 | <.0001   | 0.3500           | 0.3149           | <.0001                     | <u>&lt;.0001</u>            | <.0001                      |
| 24                             |         |                  |                  |                       |                        |                        | <.0001   | 0.2910           | 0.2520           | <.0001                     | <.0001                      | <u>&lt;.0001</u>            |
| 0                              |         |                  |                  |                       |                        |                        |          | <u>&lt;.0001</u> | <u>&lt;.0001</u> | 1.0000                     | 0.0206                      | 0.0010                      |
| CTX 12                         |         |                  |                  |                       |                        |                        |          |                  | 1.0000           | <.0001                     | <u>&lt;.0001</u>            | <.0001                      |
| 24                             |         |                  |                  |                       |                        |                        |          |                  |                  | <.0001                     | <.0001                      | <u>&lt;.0001</u>            |
| 0                              |         |                  |                  |                       |                        |                        |          |                  |                  |                            | <u>0.0142</u>               | <u>0.0007</u>               |
| H <sub>2</sub> S -<br>CTX 12   |         |                  |                  |                       |                        |                        |          |                  |                  |                            |                             | 0.9914                      |
| 24                             |         |                  |                  |                       |                        |                        |          |                  |                  |                            |                             |                             |

985

986

987

988

989

990

991

992

993

994

995

996

997 **S5 Table. Primers used in this study.**

| Primer name  | Sequence (5'→ 3')                                                             | Source    |
|--------------|-------------------------------------------------------------------------------|-----------|
| H1_phsABC_P1 | TACAAATTAAATATAATCTTCAGCTATATCTAATAAC<br>AGGAGGTTATATGATTCCGGGGATCCGTCGACC    | This work |
| H2_phsABC_P2 | TTCTTGCTGACATTATTTTATGGATACGCTCAGACCG<br>CGGACTTATCCCCGCGTGTAGGCTGGAGCTGCTTCG | This work |
| phsABC_ext_F | GGTTTATCGTGTTGACATGC                                                          | This work |
| phsABC_ext_R | GTCAGGATGGTCTCTATTTGC                                                         | This work |

998

999

1000

1001

1002

1003

1004

1005

1006

1007

1008

1009



1010

1011

1012

1013 **S6 Table. Plasmids used in this study.**

| Plasmid name                            | Description                                                                                                                             | GenBank Access number | Reference                     |
|-----------------------------------------|-----------------------------------------------------------------------------------------------------------------------------------------|-----------------------|-------------------------------|
| <u>In-frame genes deletion</u>          |                                                                                                                                         |                       |                               |
| pKD46                                   | Thermosensitive helper plasmid. It carries the $\lambda$ phage Red recombination system. Ara <sup>Ind</sup> , Amp <sup>R</sup>          | AY048746              | Datsenko & Wanner 2000        |
| pKD13                                   | Kanamycin resistance cassette carrier plasmid.                                                                                          | AY048744              | Datsenko & Wanner 2000        |
| pCP20                                   | Thermosensitive helper plasmid. It carries the FLP recombinase. Amp <sup>R</sup>                                                        | -                     | Cherepanov & Wackernagel 1995 |
| <u>H<sub>2</sub>S production</u>        |                                                                                                                                         |                       |                               |
| pTrc99a                                 | Empty vector                                                                                                                            |                       | Bang <i>et al.</i> 2000       |
| pSB74 (pH <sub>2</sub> S)               | pTrc99a + <i>phsABC</i>                                                                                                                 | -                     | Bang <i>et al.</i> 2000       |
| <u>Random transposition mutagenesis</u> |                                                                                                                                         |                       |                               |
| pZXL5                                   | Thermosensitive plasmid. It carries a <i>mariner</i> transposon (Gm <sup>R</sup> ) and a <i>mariner</i> transposase. Chlor <sup>R</sup> | JQ088279.1            | Zhang <i>et al.</i> 2012      |

1014

1015

**A**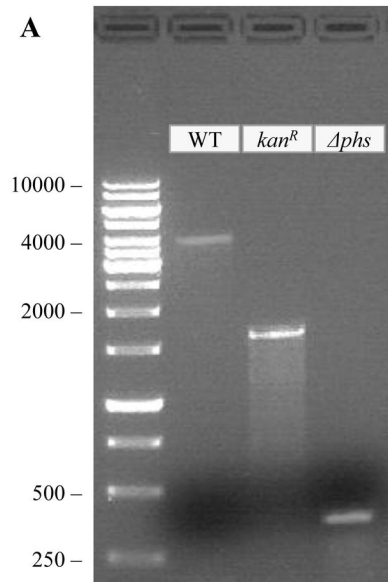**B**

*Salmonella Typhimurium*  
WT  $\Delta phs$   $\Delta phs^c$

+T-S  
0 mM

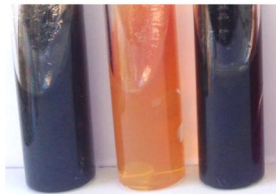

+T-S  
20 mM

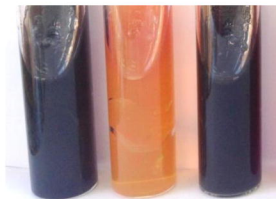**C**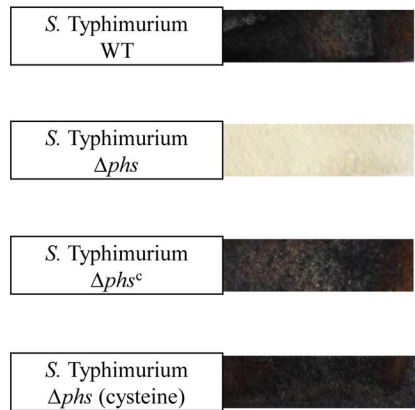

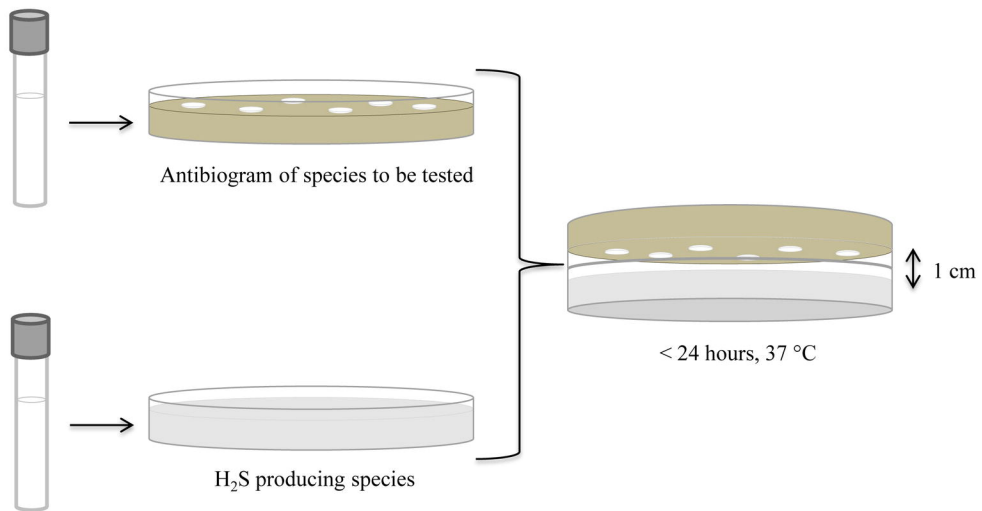

Control

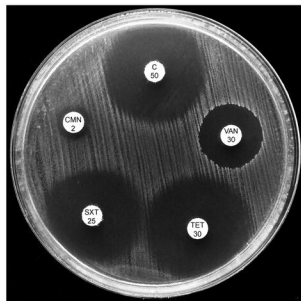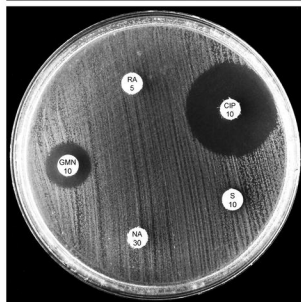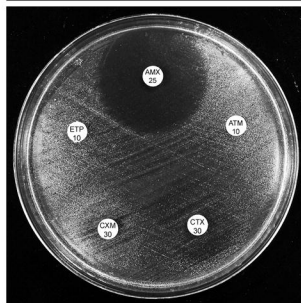

*S. Typhimurium*

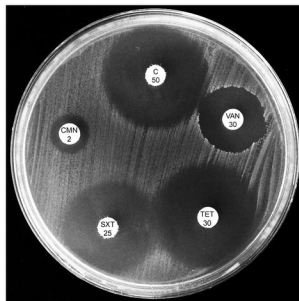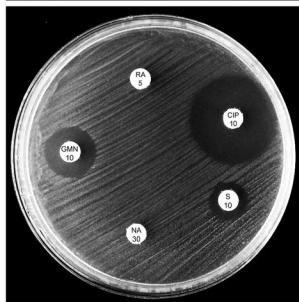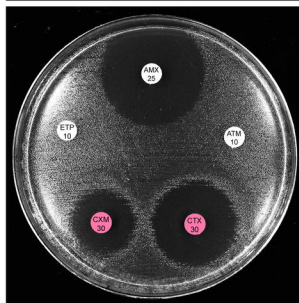

*E. coli* (pH2S)

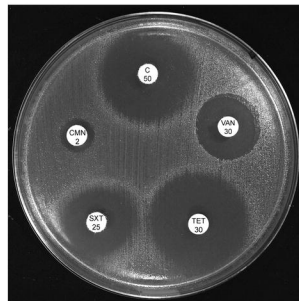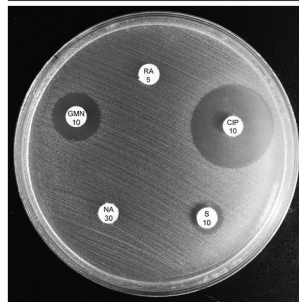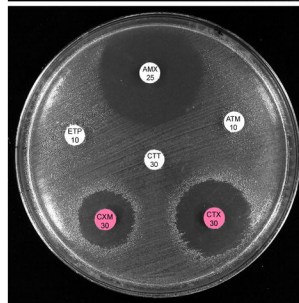

*P. vulgaris*

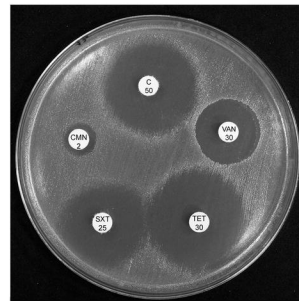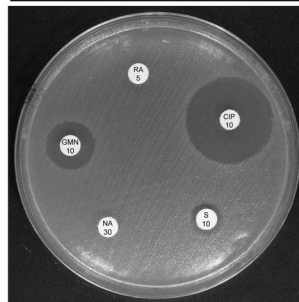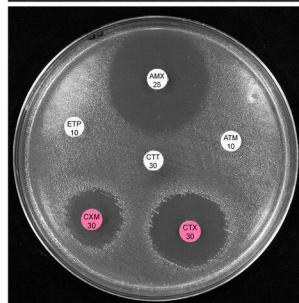

*E. faecalis*

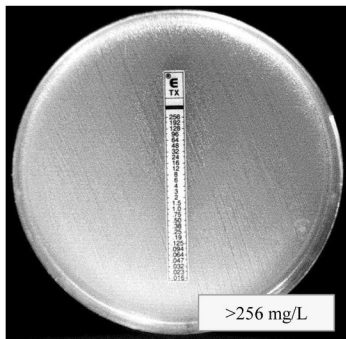

>256 mg/L

*E. faecalis*  
vs. *S. Typhimurium* WT

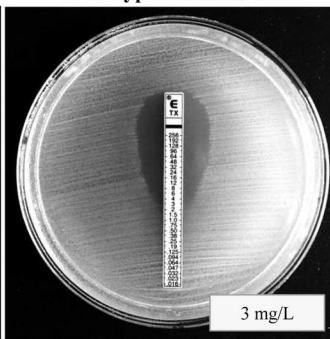

3 mg/L

*E. faecalis*  
vs. *S. Typhimurium*  $\Delta phs$

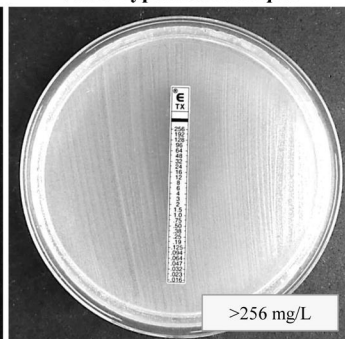

>256 mg/L

*Escherichia coli*

WT      WT (pH<sub>2</sub>S)

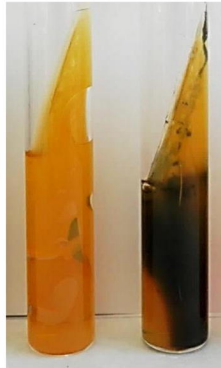

*E. coli* WT

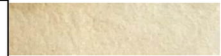

*E. coli* WT (pH<sub>2</sub>S)

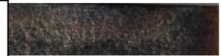

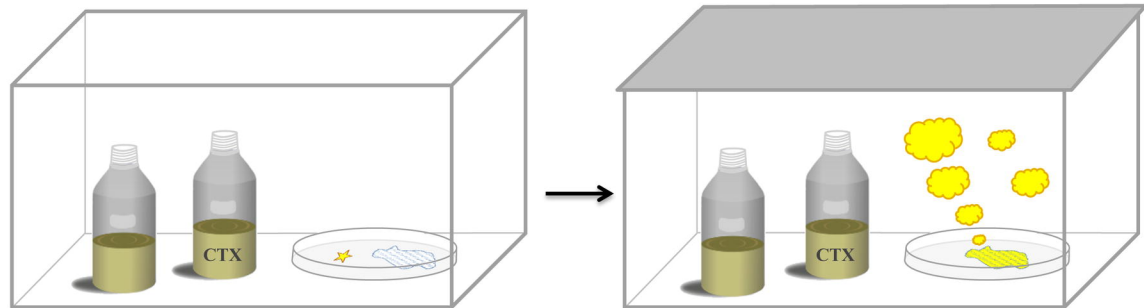

*E. faecalis*

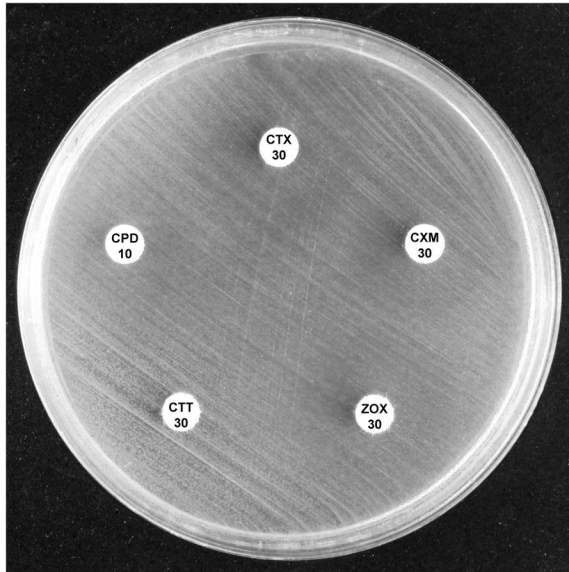

*E. faecalis* + H<sub>2</sub>S

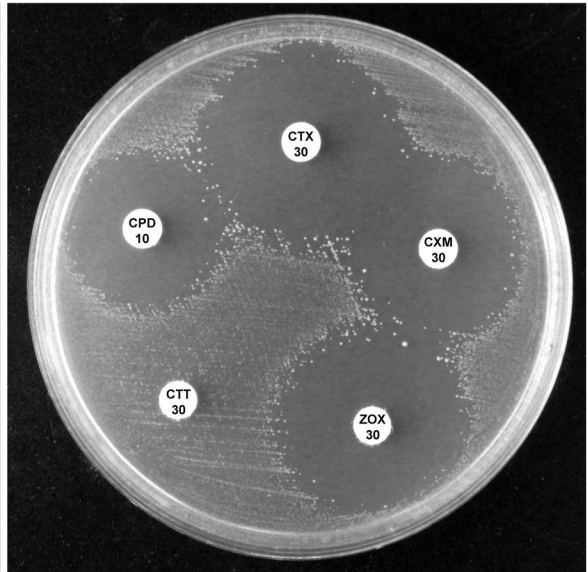



*E. faecium*

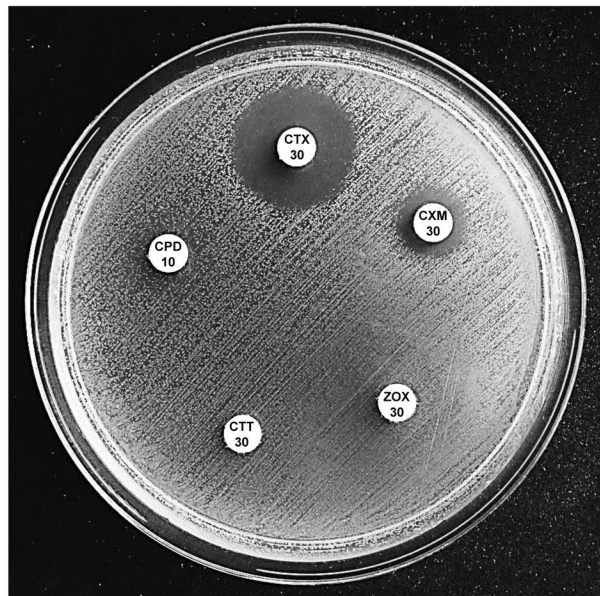

*E. faecium* + H<sub>2</sub>S

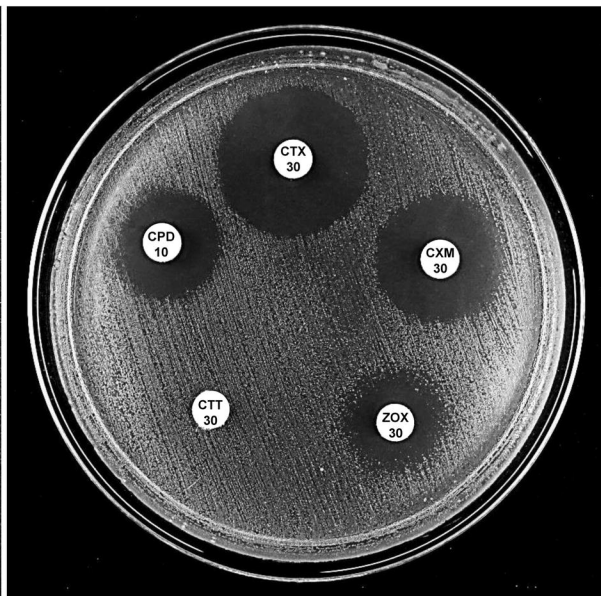

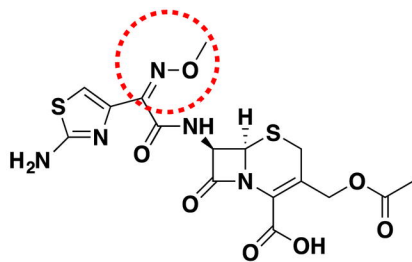

Cefotaxime

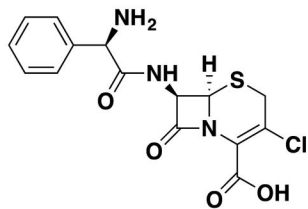

Cefaclor

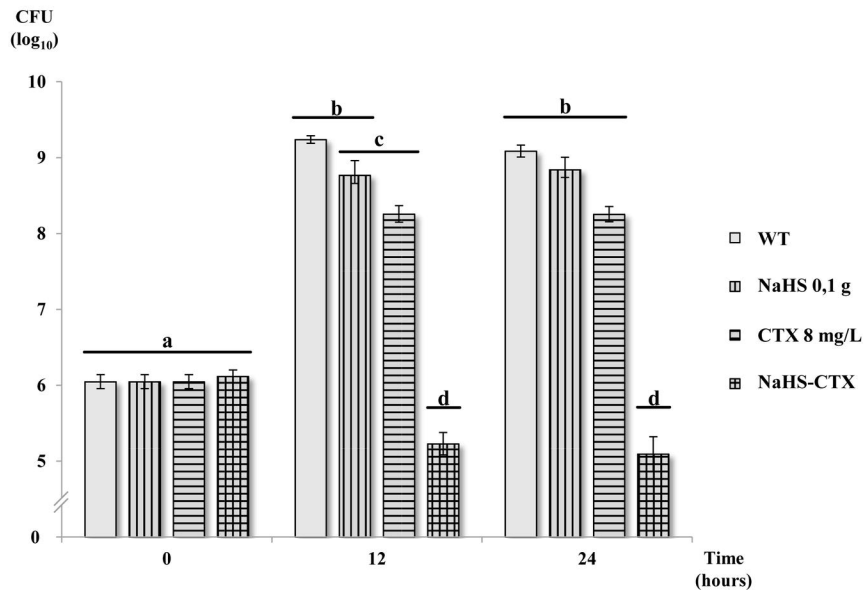

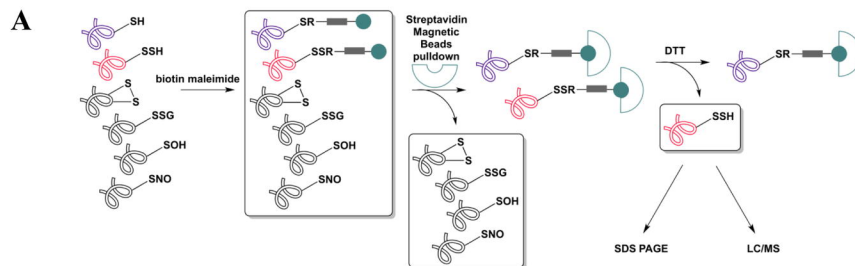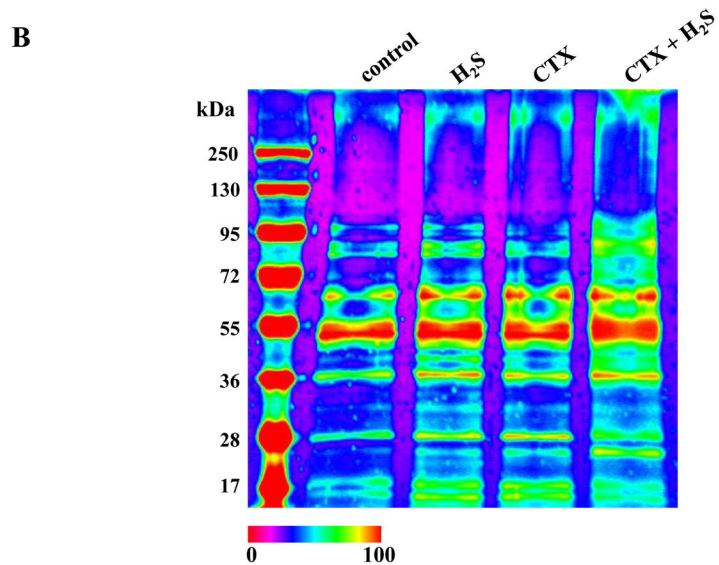

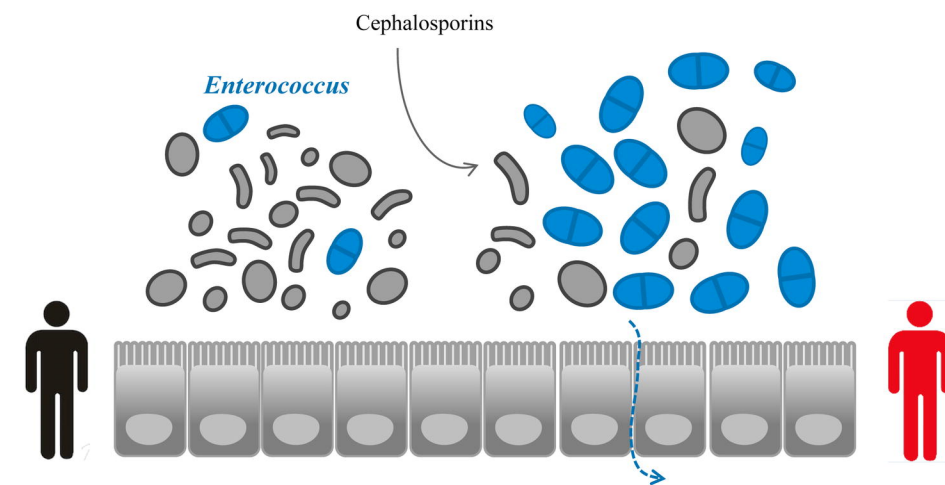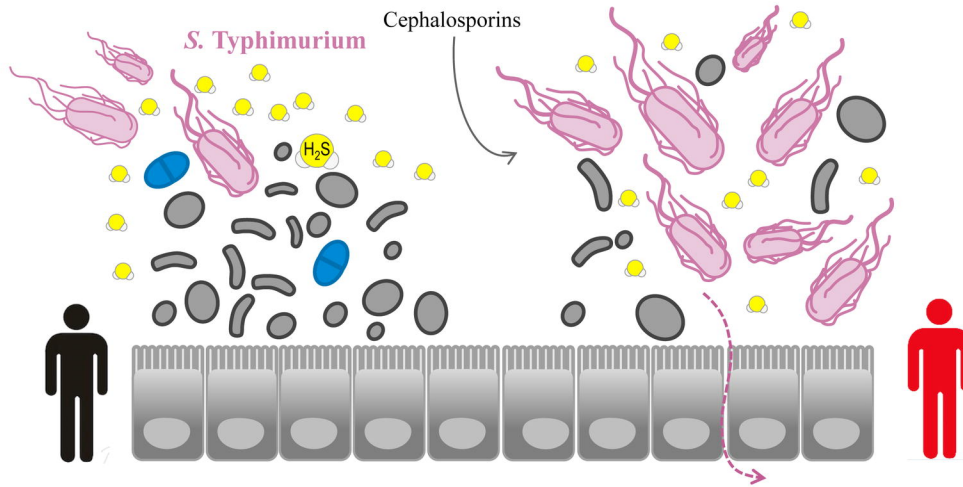

Source: http://biorxiv.org/content/10.1101/202804v1.full.pdf
